# Supplementary material for: Molecular interactions of FG nucleoporin repeats at high resolution
Source: PubMed Central journal article supplement (PMC9630130; doi:10.1038/s41557-022-01035-7), 2022-09-22
Supplement: 41557_2022_1035_MOESM1_ESM.pdf [file 41557_2022_1035_MOESM1_ESM.pdf]

---

**Supplementary information**

---

**Molecular interactions of FG nucleoporin repeats at high resolution**

---

In the format provided by the authors and unedited

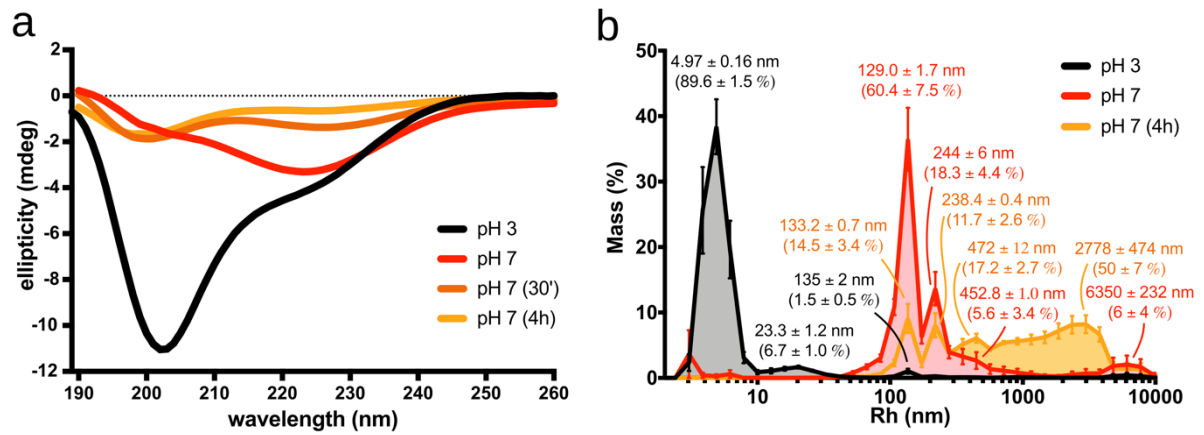

**Fig. S1 |**

**Biophysical properties of the FG-repeat domain of human Nup98. a,** Circular dichroism spectra at pH 3 (black) and 7 (red), and the evolution over time (orange, 30' and light orange, 4 h). **b,** Hydrodynamic radii of Nup98<sup>FG</sup> measured by dynamic light scattering at pH 3 (black) and 7 (red), and the evolution over time (light orange, 4 h). The sizes, together with the population percentages in mass and the respective standard errors from 12 measurements are displayed next to each peak.

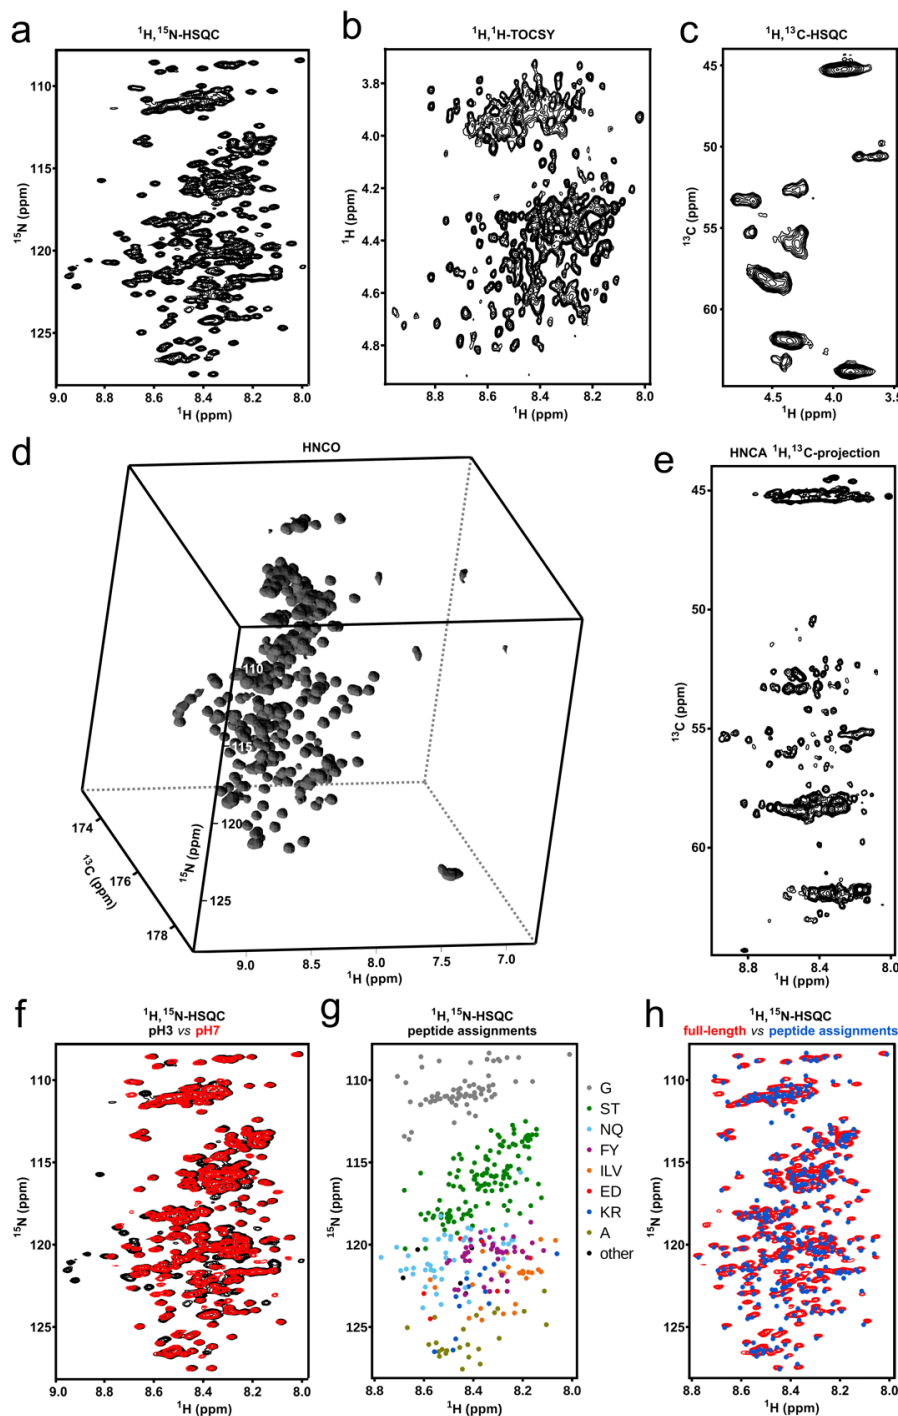

**Fig. S2** |

**NMR spectroscopy of the FG-repeat domain of human Nup98.** **a-c**,  $^1\text{H}, ^{15}\text{N}$ -HSQC (a),  $^1\text{H}, ^1\text{H}$ -TOCSY (b) and  $^1\text{H}, ^{13}\text{C}$ -HSQC (c) spectrum of Nup98<sup>FG</sup> at pH 3. **d**, 3D HNCO spectrum of Nup98<sup>FG</sup> at pH 3. **e**, Projection of the  $^1\text{H}, ^{13}\text{C}$  planes of the 3D HNCA spectrum of Nup98<sup>FG</sup> at pH 3. **f**, Comparison of the  $^1\text{H}, ^{15}\text{N}$ -HSQC spectra of Nup98<sup>FG</sup> at pH 3 (black; same as in (a)) and pH 7 (red). **g**,  $^1\text{H}, ^{15}\text{N}$ -correlation spectrum that was generated from the chemical shifts, which were obtained through the assignment of the 17 peptides at pH 6.8. Each type of residue is colored as indicated. **h**, Same correlation spectrum as in (g; now in blue) over the  $^1\text{H}, ^{15}\text{N}$ -HSQC spectrum of Nup98<sup>FG</sup> measured at pH 7 before signal decay due to gel/aggregate formation.

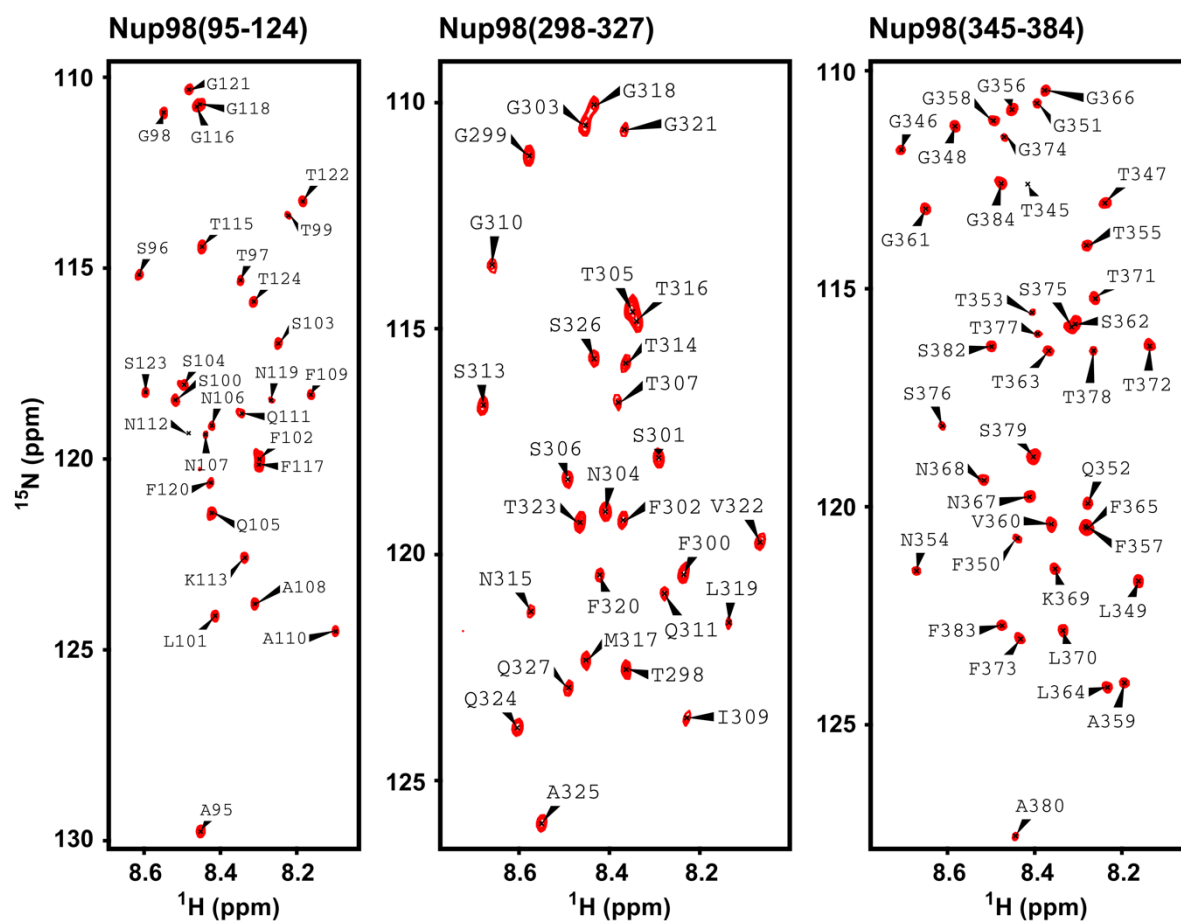

**Fig. S3** |

**NMR spectroscopy of peptides from the FG-repeat domain of Nup98.** Two-dimensional  $^1\text{H}$ - $^{15}\text{N}$  HSQC spectra of three of the Nup98 peptides used for the assignment of the 384-residue Nup98<sup>FG</sup> protein. Samples were prepared at 2 mM peptide concentration in sodium phosphate buffer, pH 6.8 and measured at 278 K.



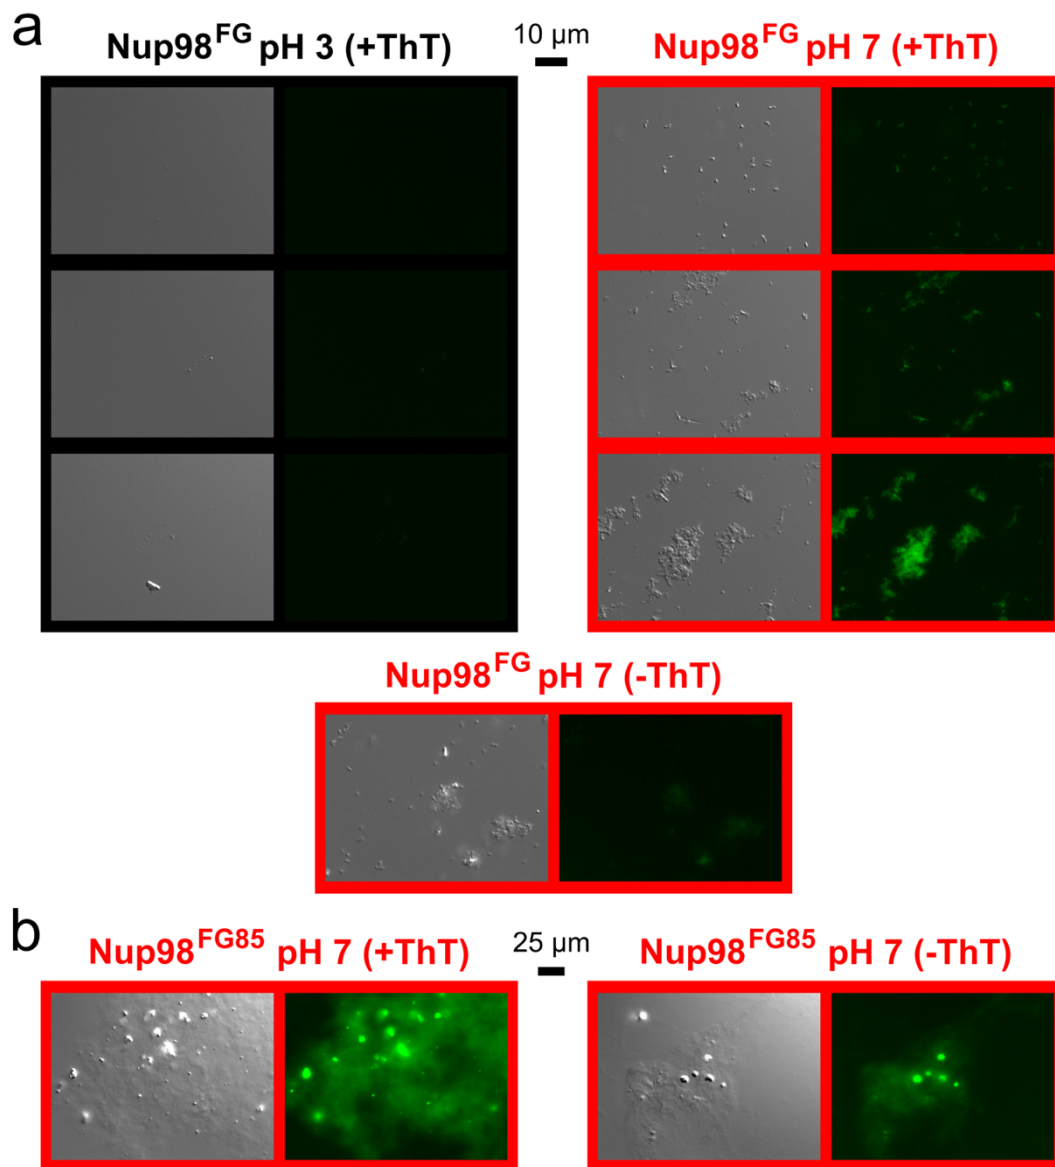

**Fig. S4 |**

**The FG-repeat domain of human Nup98 forms cross- $\beta$  structure.** **a**, Differential interference contrast (left of each panel) and fluorescence (right of each panel) microscopy of Nup98<sup>FG</sup> at pH 3 (top left, black) and pH 7 (top right, red) in the presence of ThT, and at pH 7 in the absence of ThT (bottom, red) displaying autofluorescence typical of amyloid-like structures<sup>1</sup>. Zooms of these micrographs are used in Fig. 1G. **b**, Nup98<sup>FG85</sup> differential interference contrast (left of each panel) and fluorescence (right of each panel) microscopy at pH 7 in the presence (left) and absence (right) of ThT. For autofluorescence micrographs, 100 times-longer exposure times were used.

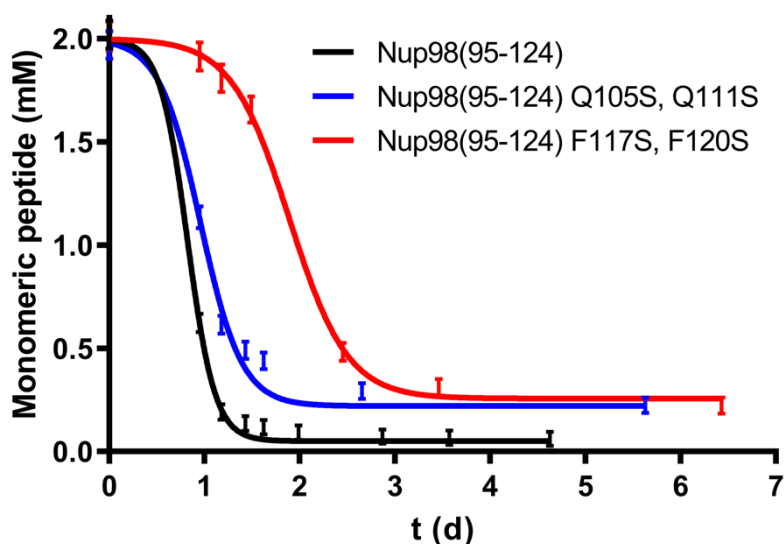

Fig. S5 |

**Impact of site-directed mutagenesis on self-association kinetics of Nup98(95-124).** Time-dependent decrease in the concentration of NMR-observable Nup98(95-124) (black) and its two variants “Nup98(95-124) Q105S, Q111S” (blue) and “Nup98(95-124) F117S, F120S” (red). The concentrations are calculated from the integral of the 1D  $^1\text{H}$  NMR peaks and the error bars represent std based on NMR signal-to-noise ratios. The experiments were acquired at 278 K with 2 mM peptide concentration, in sodium phosphate buffer, pH 6.8.

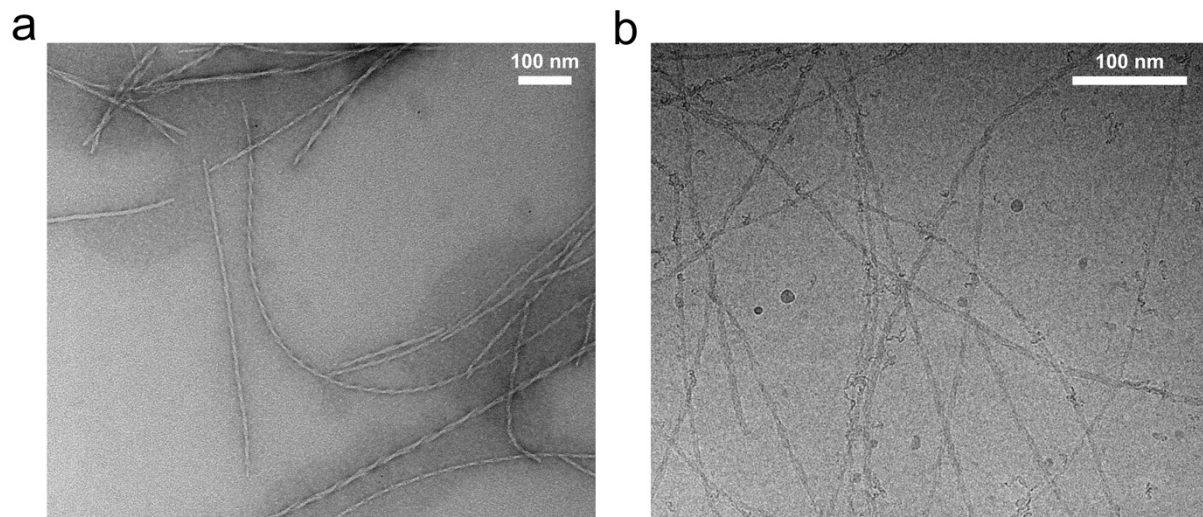

**Fig. S6 |**

**Electron microscopy of Nup98<sup>FG85</sup> fibrils.** **a**, Negative-stain electron micrograph. **b**, Cryo-electron micrograph.

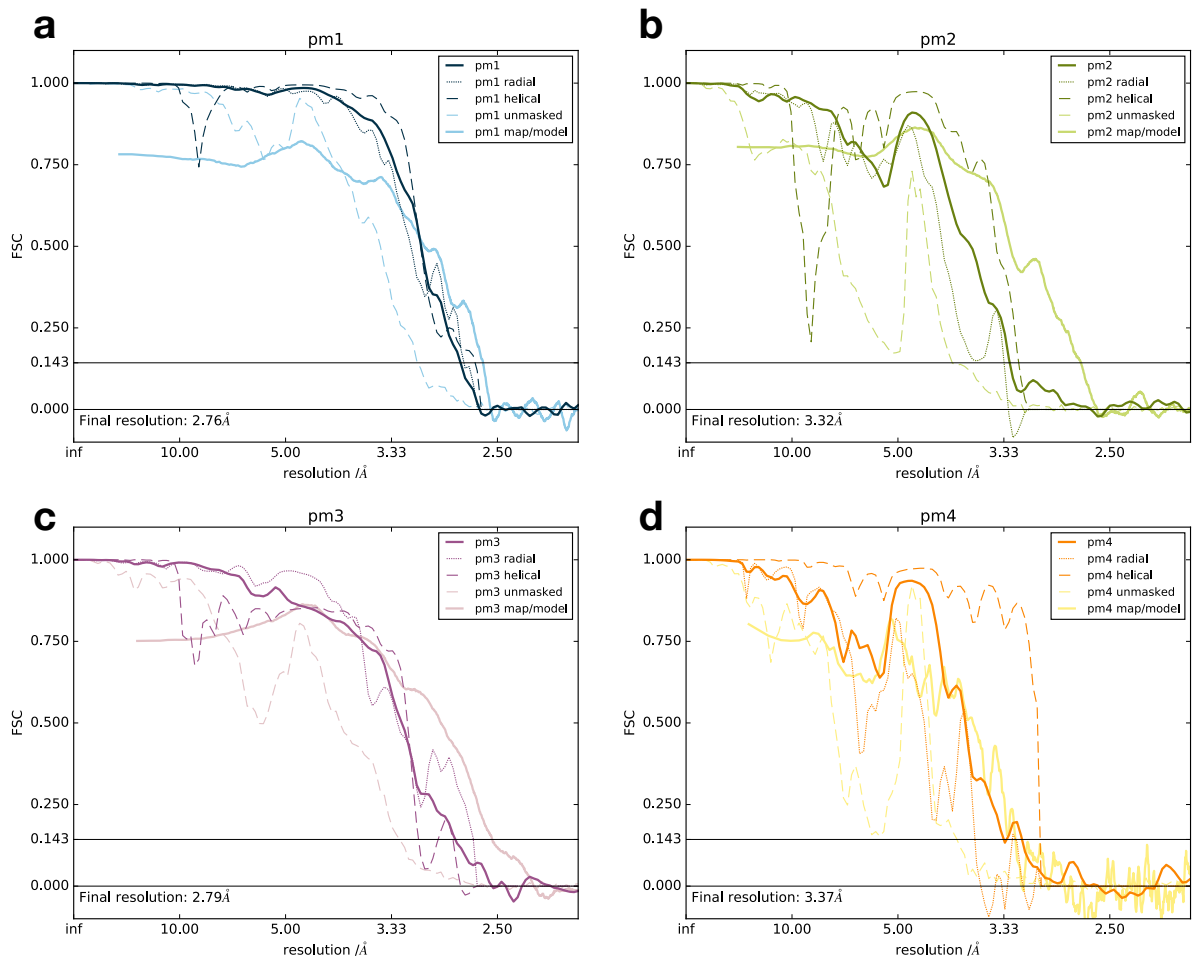

**Fig. S7 |**

**Fourier shell correlation curves.** Fourier shell correlation curves (FSC) for pm1 (a), pm2 (b), pm3 (c), and pm4 (d). The FSC curves shown between two independently refined masked (dark solid lines) and unmasked (light dashed lines) half-maps. For the masked FSC, a further calculation was made as to the contribution of the radial (dotted) and helical (dashed) directions, using 3DFSC<sup>2</sup>. Also shown is the map/model FSC calculated with Phenix Mtriage (light solid line)<sup>3</sup>, which yield model resolution values (for FSC=0.5) of 3.02 Å, 3.27 Å, 2.88 Å, 3.71 Å for pm1, pm2, pm3, and pm4, respectively. The z-percentage is 0.1 in all cases. The final resolution is shown in the plot and was estimated from the value of the FSC curve for two independently refined masked half-maps at 0.143.

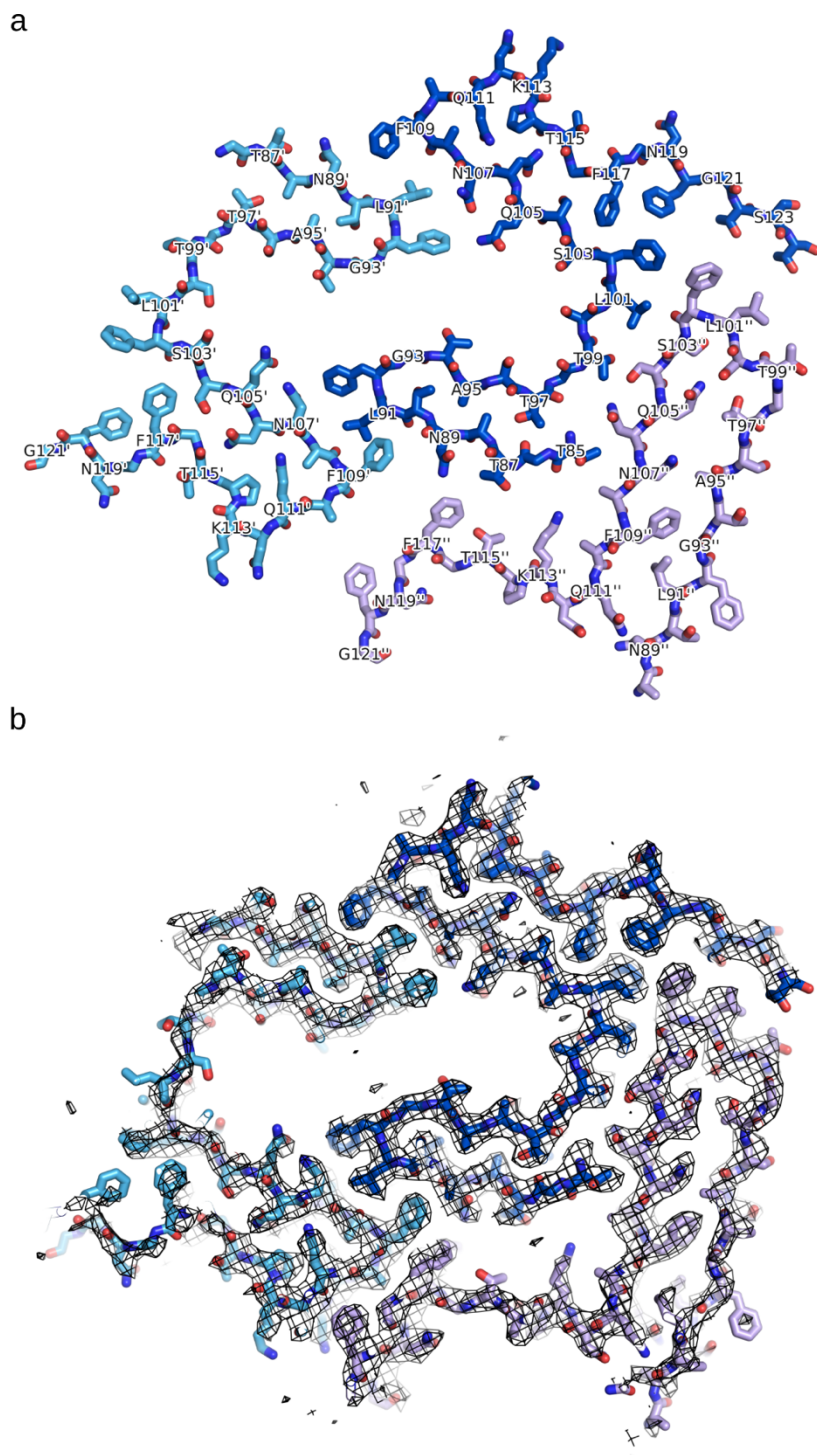

**Fig. S8 |**

**Cryo-EM map and atomic model of the Nup98<sup>FG85</sup> fibril polymorph 1 (pm1).** **a**, Single cross-section of the Nup98<sup>FG85</sup> fibril polymorph 1 in stick representation. The protofilaments are colored in different shades of blue. Residue identifiers are shown for every second amino acid. Amino acids from the light-colored protofilaments are labeled with an additional prime or double prime. **b**, Superposition of the atomic model and the final cryo-EM map (black isomesh; contour level of 0.05).

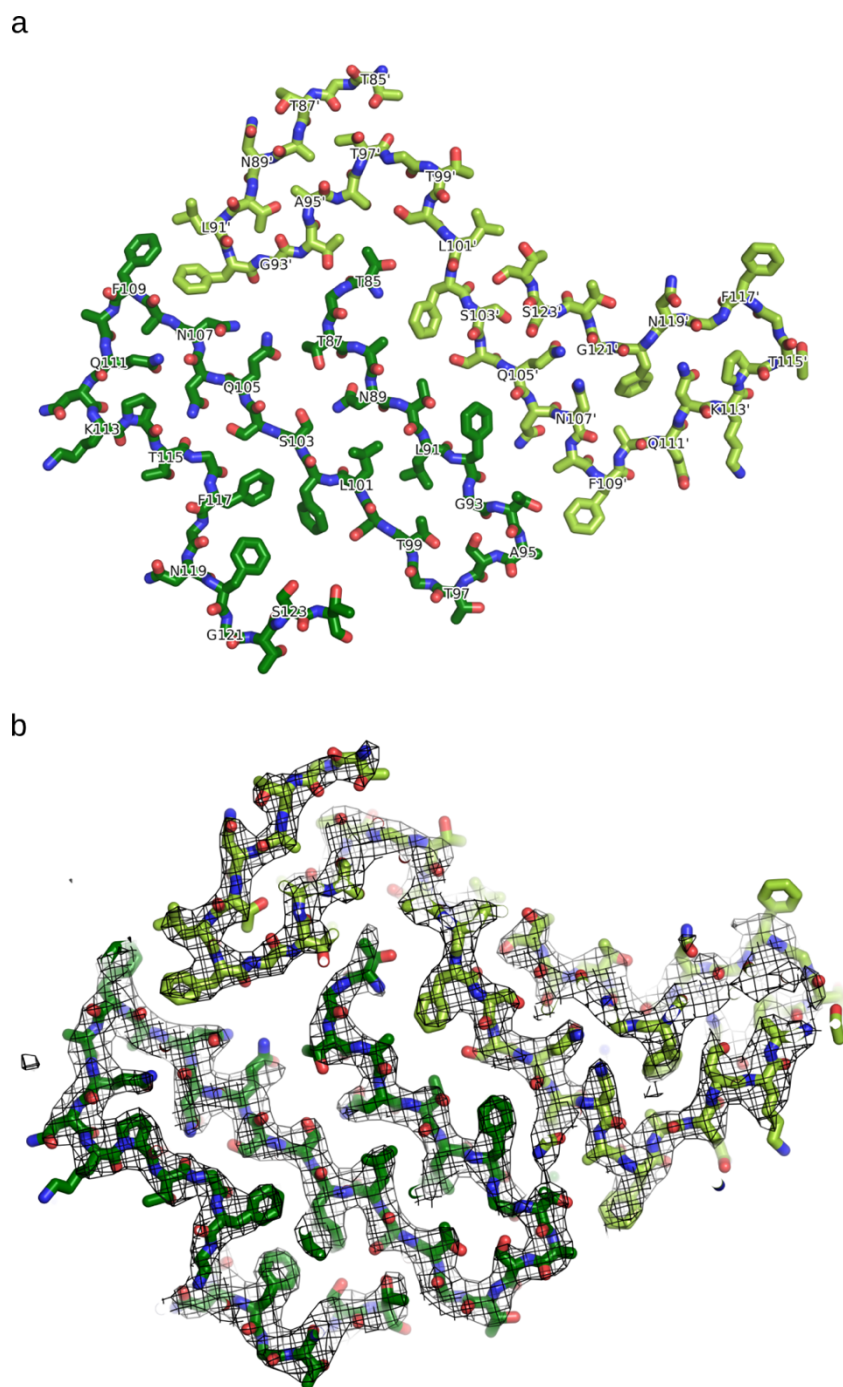

**Fig. S9** |

**Cryo-EM map and atomic model of the Nup98<sup>FG85</sup> fibril polymorph 2 (pm2).** **a**, Single cross-section of the Nup98<sup>FG85</sup> fibril polymorph 2 in stick representation. The protofilaments are colored in different shades of green. Residue identifiers are shown for every second amino acid. Amino acids from the light-colored protofilaments are labeled with an additional prime or double prime. **b**, Superposition of the atomic model and the final cryo-EM map (black isomesh; contour level of 0.05).



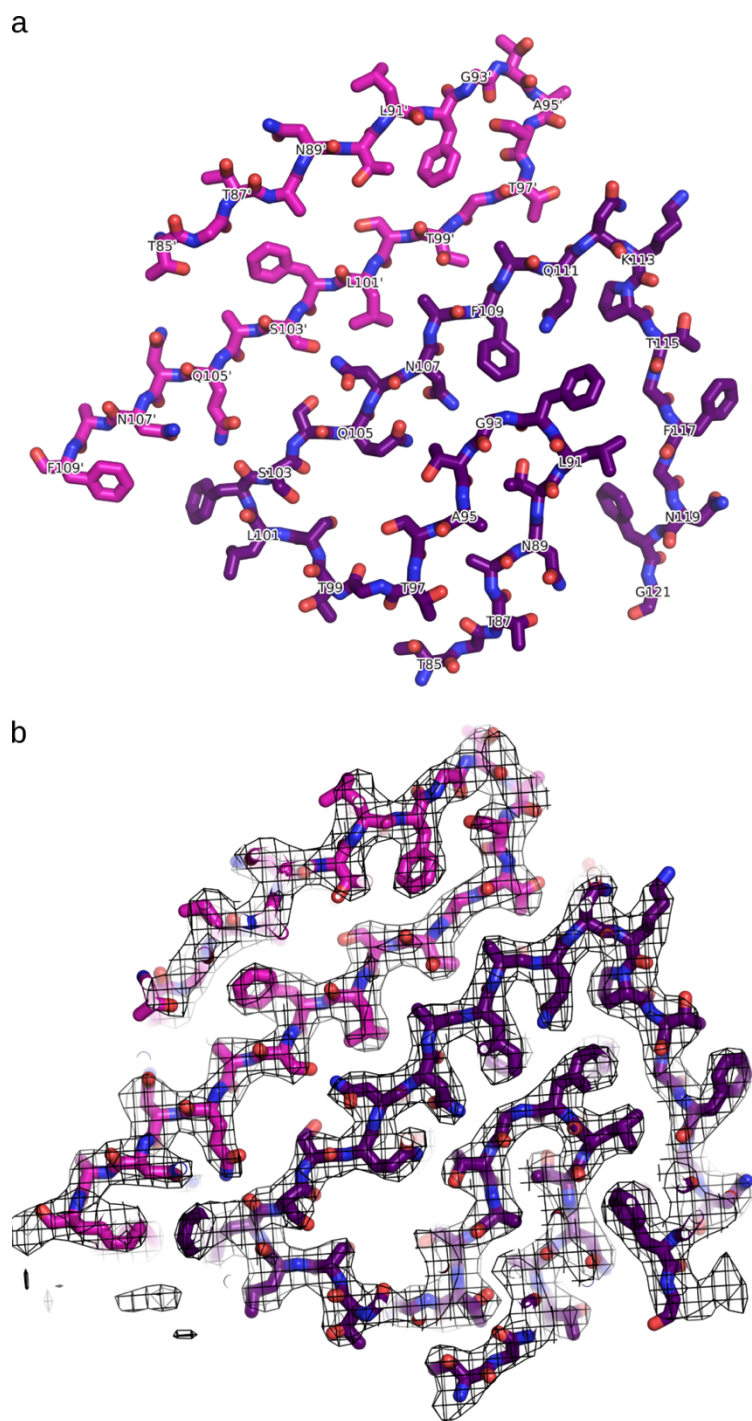

**Fig. S10 |**

**Cryo-EM map and atomic model of the Nup98<sup>FG85</sup> fibril polymorph 3 (pm3).** **a**, Single cross-section of the Nup98<sup>FG85</sup> fibril polymorph 3 in stick representation. The protofilaments are colored in different shades of violet. Residue identifiers are shown for every second amino acid. Amino acids from the light-colored protofilaments are labeled with an additional prime or double prime. **b**, Superposition of the atomic model and the final cryo-EM map (black isomesh; contour level of 0.05).

a

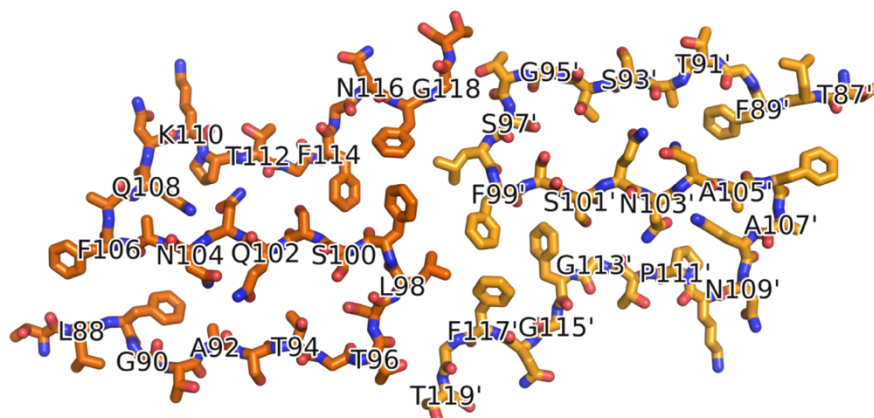

b

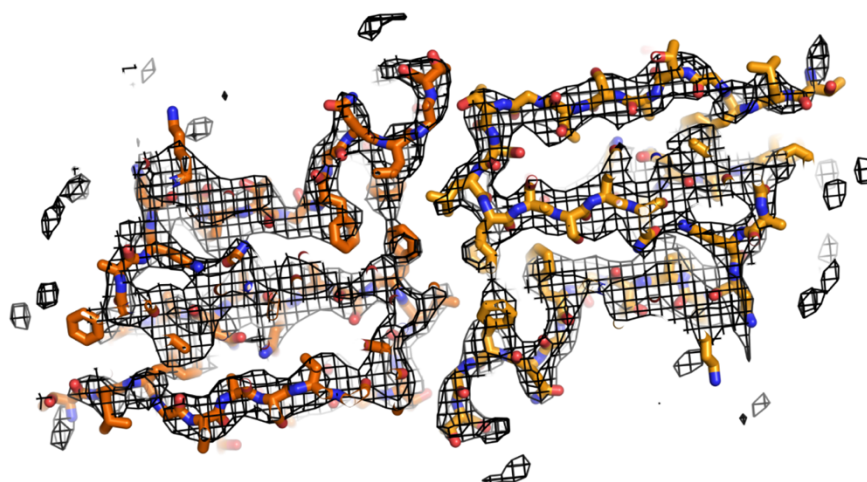

**Fig. S11 |**

**Cryo-EM map and atomic model of the Nup98<sup>FG85</sup> fibril polymorph 4 (pm4).** **a**, Single cross-section of the Nup98<sup>FG85</sup> fibril polymorph 4 in stick representation. The protofilaments are colored in different shades of orange. Residue identifiers are shown for every second amino acid. Amino acids from the light-colored protofilaments are labeled with an additional prime or double prime. **b**, Superposition of the atomic model and the final cryo-EM map (black isomesh; contour level of 0.04).



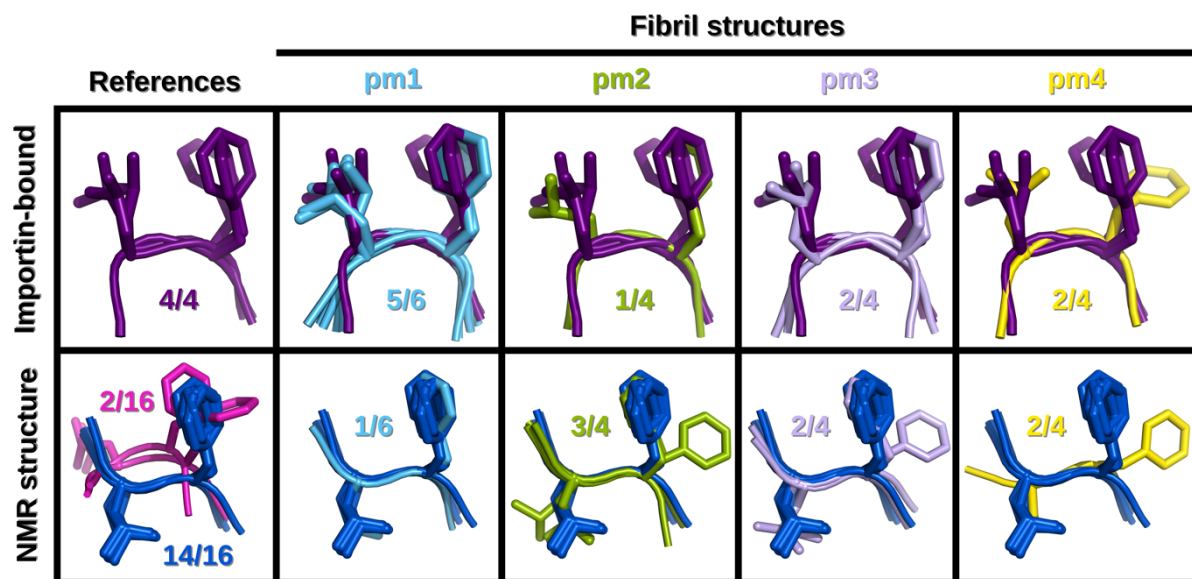

Fig. S12 |

**Structures of xLFx motifs of Nup98<sup>FG85</sup> fibrils.** For each polymorph (pm1-pm4; different columns), the structures of their xLFx motifs are compared with the importin-bound GLFG structures (PDB id: 1O6P, purple, top row) and with the TALOS-N calculated structures from NMR data (blue, bottom row). The reference structures are represented alone in the left column. The two NMR-derived structures that have a different conformation are shown in magenta (bottom row; left). The number of structures of each polymorph represented from the total of motifs of that polymorph are displayed next to the structures.

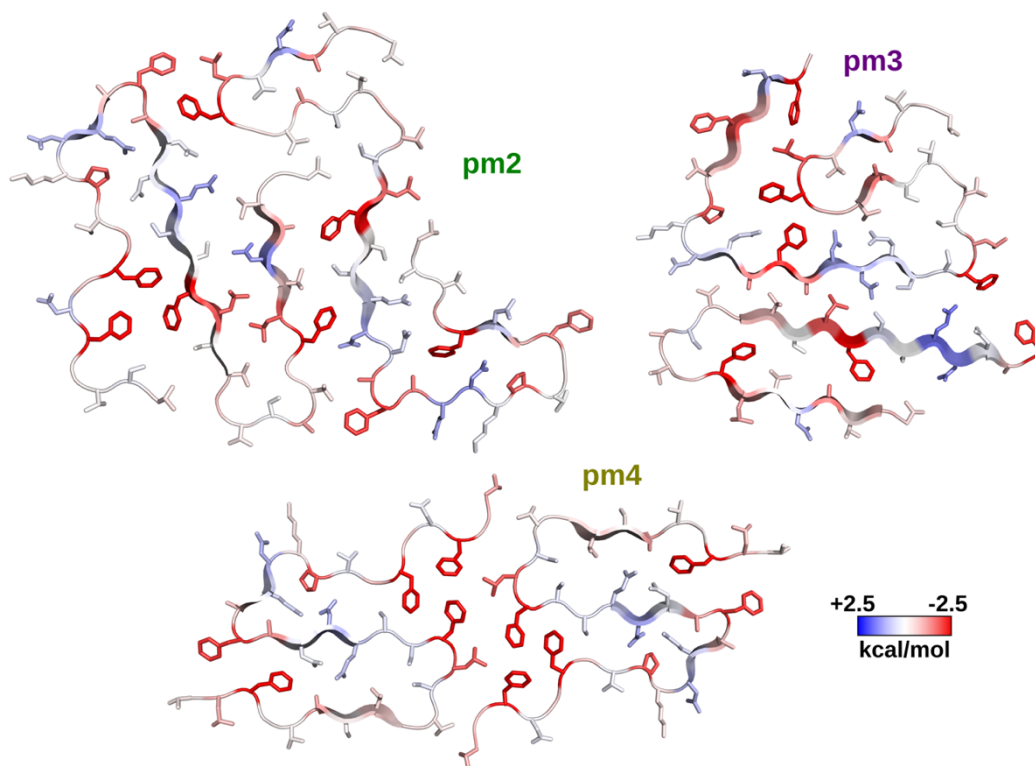

**Fig. S13 |**

**Solvation energy stabilities of the fibril polymorphs 2, 3 and 4 of Nup98<sup>FG85</sup>.** Residue-specific stabilities based on solvation energies mapped onto the structures of the Nup98<sup>FG85</sup> polymorphs 2, 3 and 4 (pm2-pm4). Red and blue represent high and low stability, respectively.

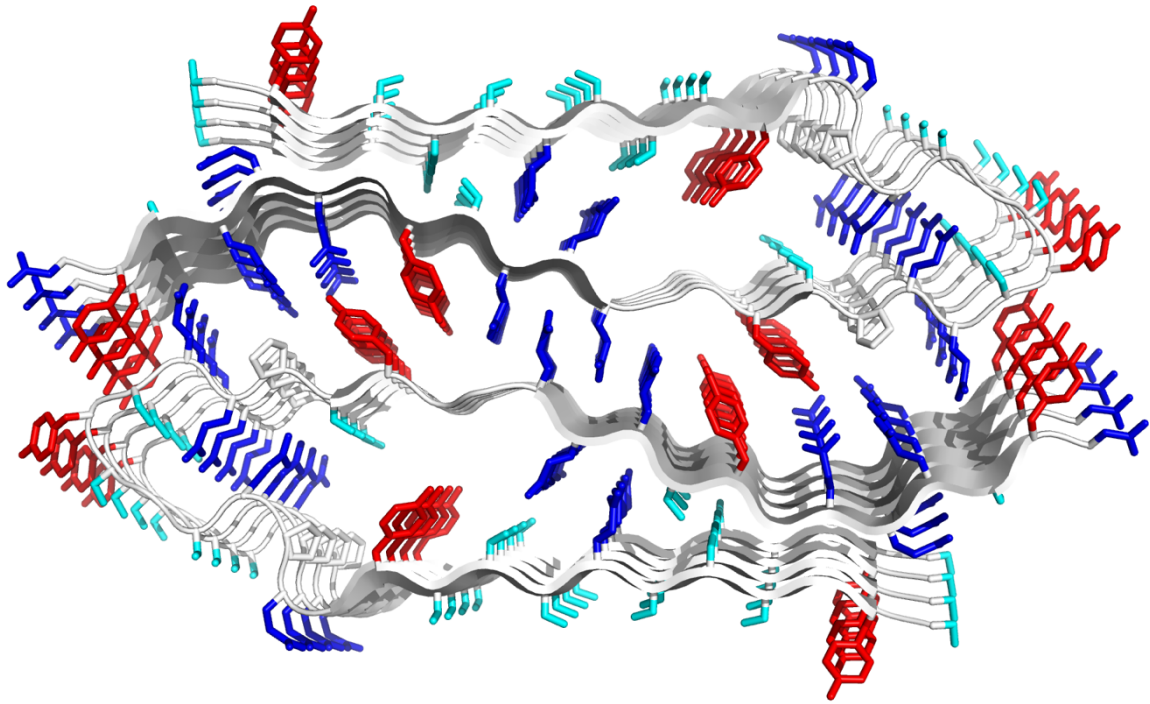

**Fig. S14 |**

CryoEM structure of FUS-LC fibrils (PDB: 6XFM). Tyrosine side chains are colored in red and polar residues in blue (glutamine and asparagine) and cyan (serine and threonine).

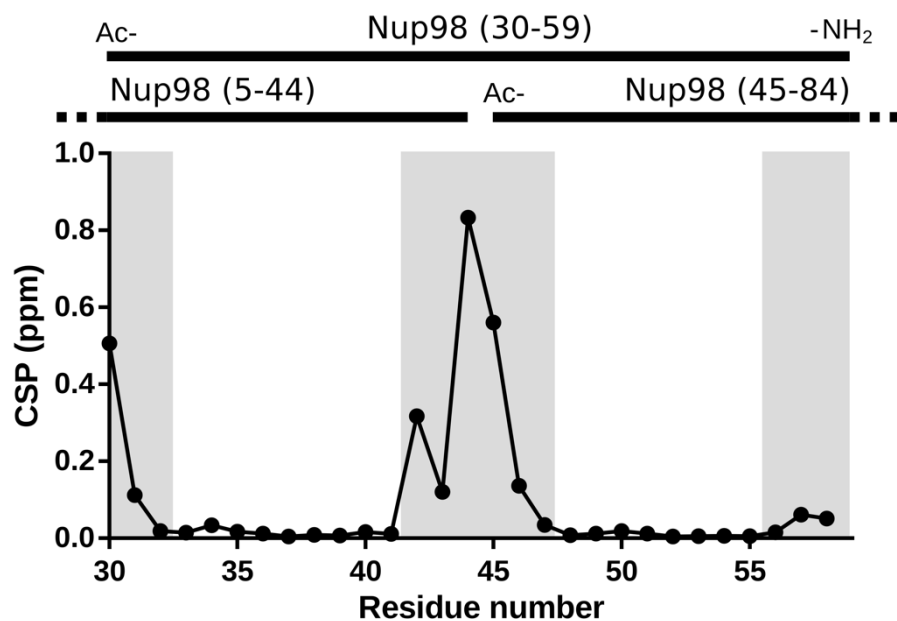

**Fig. S15 |**

**Chemical shift selection from peptide assignments.** Normalized and averaged  $^1\text{H}$ - $^{15}\text{N}$  chemical shift differences between overlapped peptides. Differences are restricted to the 2-3 terminal residues, which were excluded from the selected chemical shifts for the full Nup98<sup>FG</sup> assignment.

### Supplementary References

- 1 Grelich-Mucha, M. *et al.* Autofluorescence of Amyloids Determined by Enantiomeric Composition of Peptides. *J Phys Chem B* **125**, 5502-5510 (2021).
- 2 Tan, Y. Z. *et al.* Addressing preferred specimen orientation in single-particle cryo-EM through tilting. *Nat Methods* **14**, 793-796 (2017).
- 3 Afonine, P. V. *et al.* New tools for the analysis and validation of cryo-EM maps and atomic models. *Acta Crystallogr D Struct Biol* **74**, 814-840 (2018).

**Table S1 | Nuclear magnetic resonance chemical shift assignments of the 17 peptides of Nup98<sup>FG</sup> and the full 1-384 Nup98<sup>FG</sup>.** For each peptide the fragment name followed by the sequence and the list of chemical shifts are shown. Each chemical shift line includes the residue number, residue type, atom name and chemical shift (ppm).

|                               |                |                               |                |
|-------------------------------|----------------|-------------------------------|----------------|
| <b>Nup98<sup>FG1-15</sup></b> | 8 T CB 69.759  | <b>Nup98<sup>FG5-44</sup></b> | 7 G N 112      |
| MFNKSFGTPF                    | 8 T HA 4.613   | SFGTPFGGGT                    | 8 G CA 45.286  |
| GGGTG                         | 8 T HN 8.183   | GGFGTTSTFG                    | 8 G HA2 3.925  |
|                               | 8 T N 116.035  | QNTGFGTTSG                    | 8 G HA3 3.925  |
| 1 M CA 55.148                 | 9 P CA 63.355  | GAFGTSAFGS                    | 8 G HN 8.01    |
| 1 M CB 33.364                 | 9 P CB 32.043  |                               | 8 G N 108.431  |
| 1 M HA 3.97                   | 9 P HA 4.377   | 1 S CA 58.221                 | 9 G CA 45.211  |
| 2 F CA 57.943                 | 10 F CA 58.201 | 1 S CB 63.751                 | 9 G HA2 4.035  |
| 2 F CB 39.642                 | 10 F CB 39.315 | 1 S HA 4.37                   | 9 G HA3 4.035  |
| 2 F HA 4.637                  | 10 F HA 4.572  | 1 S HN 8.314                  | 9 G HN 8.411   |
| 2 F HN 8.284                  | 10 F HN 8.526  | 1 S N 119.811                 | 9 G N 108.93   |
| 2 F N 121.816                 | 10 F N 120.757 | 2 F CA 57.899                 | 10 T CA 62.039 |
| 3 N CA 52.915                 | 11 G CA 45.37  | 2 F CB 39.564                 | 10 T CB 69.795 |
| 3 N CB 39.061                 | 11 G HA2 3.829 | 2 F HA 4.654                  | 10 T HA 4.376  |
| 3 N HA 4.603                  | 11 G HA3 3.899 | 2 F HN 8.469                  | 10 T HN 8.328  |
| 3 N HN 8.528                  | 11 G HN 8.441  | 2 F N 122.366                 | 10 T N 113.057 |
| 3 N N 122.099                 | 11 G N 111.84  | 3 G CA 45.101                 | 11 G CA 45.286 |
| 4 K CA 56.784                 | 12 G CA 45.245 | 3 G HA2 3.886                 | 11 G HA2 3.933 |
| 4 K CB 42.058                 | 12 G HA2 3.942 | 3 G HA3 3.94                  | 11 G HA3 3.933 |
| 4 K HA 4.192                  | 12 G HA3 3.942 | 3 G HN 8.464                  | 11 G HN 8.612  |
| 4 K HN 8.419                  | 12 G HN 8.046  | 3 G N 110.737                 | 11 G N 111.485 |
| 4 K N 122.541                 | 12 G N 108.172 | 4 T CA 59.857                 | 12 G CA 45.026 |
| 5 S CA 58.398                 | 13 G CA 45.166 | 4 T CB 69.798                 | 12 G HA2 3.858 |
| 5 S CB 63.693                 | 13 G HA2 4.043 | 4 T HA 4.615                  | 12 G HA3 3.858 |
| 5 S HA 4.391                  | 13 G HA3 4.043 | 4 T HN 8.178                  | 12 G HN 8.263  |
| 5 S HN 8.378                  | 13 G HN 8.451  | 4 T N 116.315                 | 12 G N 108.624 |
| 5 S N 116.589                 | 13 G N 108.678 | 5 P CA 63.381                 | 13 F CA 58.16  |
| 6 F CA 58.058                 | 14 T CA 62.133 | 5 P CB 32.036                 | 13 F CB 39.504 |
| 6 F CB 39.648                 | 14 T CB 69.713 | 5 P HA 4.374                  | 13 F HA 4.599  |
| 6 F HA 4.615                  | 14 T HA 4.361  | 6 F CA 58.333                 | 13 F HN 8.327  |
| 6 F HN 8.327                  | 14 T HN 8.36   | 6 F CB 39.34                  | 13 F N 120.275 |
| 6 F N 122.114                 | 14 T N 112.923 | 6 F HA 4.573                  | 14 G CA 45.336 |
| 7 G CA 45.036                 | 15 G CA 44.972 | 6 F HN 8.497                  | 14 G HA2 3.887 |
| 7 G HA2 3.893                 | 15 G HA2 3.883 | 6 F N 120.952                 | 14 G HA3 3.975 |
| 7 G HA3 3.947                 | 15 G HA3 3.926 | 7 G CA 45.303                 | 14 G HN 8.534  |
| 7 G HN 8.416                  | 15 G HN 8.639  | 7 G HA2 3.823                 | 14 G N 111.129 |
| 7 G N 110.356                 | 15 G N 112.176 | 7 G HA3 3.874                 | 15 T CA 61.844 |
| 8 T CA 59.827                 |                | 7 G HN 8.417                  | 15 T CB 70.016 |

|                |                |                |                                 |
|----------------|----------------|----------------|---------------------------------|
| 15 T HA 4.463  | 23 T N 114.055 | 32 A CB 19.138 | 40 S HN 7.903                   |
| 15 T HN 8.189  | 24 G CA 45.303 | 32 A HA 4.245  | 40 S N 121.388                  |
| 15 T N 113.534 | 24 G HA2 3.825 | 32 A HN 8.301  |                                 |
| 16 T CA 61.887 | 24 G HA3 3.908 | 32 A N 123.879 | <b>Nup98</b> <sup>FG30-59</sup> |
| 16 T CB 69.848 | 24 G HN 8.46   | 33 F CA 58.005 | GTTSGGAFGT                      |
| 16 T HA 4.414  | 24 G N 110.789 | 33 F CB 39.514 | SAFGSSNNTG                      |
| 16 T HN 8.355  | 25 F CA 58.039 | 33 F HA 4.554  | GLFGNSQTKP                      |
| 16 T N 116.345 | 25 F CB 39.529 | 33 F HN 8.411  |                                 |
| 17 S CA 58.396 | 25 F HA 4.602  | 33 F N 119.678 | 1 G CA 45.361                   |
| 17 S CB 63.882 | 25 F HN 8.266  | 34 G CA 45.328 | 1 G HA2 3.971                   |
| 17 S HA 4.513  | 25 F N 120.414 | 34 G HA2 3.875 | 1 G HA3 3.971                   |
| 17 S HN 8.501  | 26 G CA 45.336 | 34 G HA3 3.972 | 1 G HN 8.439                    |
| 17 S N 118.596 | 26 G HA2 3.887 | 34 G HN 8.325  | 1 G N 114.676                   |
| 18 T CA 61.956 | 26 G HA3 3.975 | 34 G N 111.017 | 2 T CA 61.826                   |
| 18 T CB 69.632 | 26 G HN 8.534  | 35 T CA 61.792 | 2 T CB 69.879                   |
| 18 T HA 4.306  | 26 G N 111.129 | 35 T CB 70.016 | 2 T HA 4.451                    |
| 18 T HN 8.278  | 27 T CA 61.844 | 35 T HA 4.414  | 2 T HN 8.347                    |
| 18 T N 115.958 | 27 T CB 70.016 | 35 T HN 8.144  | 2 T N 113.591                   |
| 19 F CA 58.167 | 27 T HA 4.463  | 35 T N 113.318 | 3 T CA 61.818                   |
| 19 F CB 39.509 | 27 T HN 8.189  | 36 S CA 58.415 | 3 T CB 69.879                   |
| 19 F HA 4.565  | 27 T N 113.534 | 36 S CB 63.866 | 3 T HA 4.428                    |
| 19 F HN 8.333  | 28 T CA 61.904 | 36 S HA 4.444  | 3 T HN 8.397                    |
| 19 F N 122.83  | 28 T CB 70.016 | 36 S HN 8.507  | 3 T N 116.157                   |
| 20 G CA 45.278 | 28 T HA 4.452  | 36 S N 118.482 | 4 S CA 58.513                   |
| 20 G HA2 3.755 | 28 T HN 8.397  | 37 A CA 52.6   | 4 S CB 63.653                   |
| 20 G HA3 3.887 | 28 T N 116.026 | 37 A CB 19.129 | 4 S HA 4.469                    |
| 20 G HN 8.426  | 29 S CA 58.614 | 37 A HA 4.255  | 4 S HN 8.493                    |
| 20 G N 111.484 | 29 S CB 63.842 | 37 A HN 8.438  | 4 S N 118.368                   |
| 21 Q CA 55.852 | 29 S HA 4.478  | 37 A N 126.057 | 5 G CA 45.415                   |
| 21 Q CB 29.47  | 29 S HN 8.492  | 38 F CA 58.152 | 5 G HA2 3.957                   |
| 21 Q HA 4.303  | 29 S N 118.264 | 38 F CB 39.509 | 5 G HA3 3.957                   |
| 21 Q HN 8.244  | 30 G CA 45.359 | 38 F HA 4.57   | 5 G HN 8.574                    |
| 21 Q N 119.725 | 30 G HA2 3.977 | 38 F HN 8.314  | 5 G N 111.331                   |
| 22 N CA 53.317 | 30 G HA3 3.977 | 38 F N 121.85  | 6 G CA 45.144                   |
| 22 N CB 38.68  | 30 G HN 8.544  | 39 G CA 45.286 | 6 G HA2 3.895                   |
| 22 N HA 4.77   | 30 G N 111.145 | 39 G HA2 3.802 | 6 G HA3 3.895                   |
| 22 N HN 8.71   | 31 G CA 45.085 | 39 G HA3 3.96  | 6 G HN 8.317                    |
| 22 N N 120.15  | 31 G HA2 3.901 | 39 G HN 8.358  | 6 G N 108.824                   |
| 23 T CA 62.095 | 31 G HA3 3.901 | 39 G N 112.053 | 7 A CA 52.543                   |
| 23 T CB 69.728 | 31 G HN 8.293  | 40 S CA 59.972 | 7 A CB 19.072                   |
| 23 T HA 4.301  | 31 G N 108.828 | 40 S CB 63.866 | 7 A HA 4.235                    |
| 23 T HN 8.255  | 32 A CA 52.479 | 40 S HA 4.292  | 7 A HN 8.314                    |

|                |                |                                 |                |
|----------------|----------------|---------------------------------|----------------|
| 7 A N 123.938  | 16 S CB 63.727 | 24 G HN 8.32                    | 2 N CA 53.258  |
| 8 F CA 58.088  | 16 S HA 4.453  | 24 G N 110.278                  | 2 N CB 38.675  |
| 8 F CB 39.432  | 16 S HN 8.544  | 25 N CA 53.22                   | 2 N HA 4.741   |
| 8 F HA 4.534   | 16 S N 117.844 | 25 N CB 39.005                  | 2 N HN 8.704   |
| 8 F HN 8.41    | 17 N CA 53.312 | 25 N HA 4.759                   | 2 N N 120.52   |
| 8 F N 119.71   | 17 N CB 38.711 | 25 N HN 8.422                   | 3 N CA 53.294  |
| 9 G CA 45.376  | 17 N HA 4.701  | 25 N N 118.978                  | 3 N CB 38.624  |
| 9 G HA2 3.866  | 17 N HN 8.511  | 26 S CA 58.815                  | 3 N HA 4.795   |
| 9 G HA3 3.96   | 17 N N 120.494 | 26 S CB 63.648                  | 3 N HN 8.54    |
| 9 G HN 8.32    | 18 N CA 53.304 | 26 S HA 4.407                   | 3 N N 119.471  |
| 9 G N 110.963  | 18 N CB 38.695 | 26 S HN 8.48                    | 4 T CA 62.214  |
| 10 T CA 61.827 | 18 N HA 4.767  | 26 S N 116.438                  | 4 T CB 69.679  |
| 10 T CB 70.042 | 18 N HN 8.491  | 27 Q CA 55.891                  | 4 T HA 4.36    |
| 10 T HA 4.389  | 18 N N 119.483 | 27 Q CB 29.445                  | 4 T HN 8.302   |
| 10 T HN 8.151  | 19 T CA 62.232 | 27 Q HA 4.38                    | 4 T N 113.928  |
| 10 T N 113.352 | 19 T CB 69.645 | 27 Q HN 8.55                    | 5 G CA 45.177  |
| 11 S CA 58.462 | 19 T HA 4.333  | 27 Q N 122.068                  | 5 G HA2 3.965  |
| 11 S CB 63.815 | 19 T HN 8.291  | 28 T CA 62.164                  | 5 G HA3 3.994  |
| 11 S HA 4.424  | 19 T N 113.926 | 28 T CB 69.769                  | 5 G HN 8.59    |
| 11 S HN 8.506  | 20 G CA 45.38  | 28 T HA 4.257                   | 5 G N 111.367  |
| 11 S N 118.367 | 20 G HA2 3.975 | 28 T HN 8.273                   | 6 G CA 45.231  |
| 12 A CA 52.633 | 20 G HA3 3.975 | 28 T N 116.337                  | 6 G HA2 3.911  |
| 12 A CB 19.031 | 20 G HN 8.574  | 29 K CA 54.188                  | 6 G HA3 3.911  |
| 12 A HA 4.233  | 20 G N 111.331 | 29 K CB 32.457                  | 6 G HN 8.341   |
| 12 A HN 8.422  | 21 G CA 45.199 | 29 K HA 4.594                   | 6 G N 108.759  |
| 12 A N 126.071 | 21 G HA2 3.886 | 29 K HN 8.518                   | 7 L CA 55.37   |
| 13 F CA 58.12  | 21 G HA3 3.886 | 29 K N 125.998                  | 7 L CB 42.264  |
| 13 F CB 39.432 | 21 G HN 8.318  | 30 P CA 63.01                   | 7 L HA 4.24    |
| 13 F HA 4.545  | 21 G N 108.822 | 30 P CB 32.341                  | 7 L HN 8.215   |
| 13 F HN 8.279  | 22 L CA 55.343 | 30 P HA 4.353                   | 7 L N 121.772  |
| 13 F N 119.617 | 22 L CB 42.226 |                                 | 8 F CA 57.734  |
| 14 G CA 45.289 | 22 L HA 4.221  | <b>Nup98</b> <sup>FG45-84</sup> | 8 F CB 39.417  |
| 14 G HA2 3.829 | 22 L HN 8.199  | SNNTGGLFGN                      | 8 F HA 4.635   |
| 14 G HA3 3.944 | 22 L N 121.736 | SQTKPGGLFG                      | 8 F HN 8.412   |
| 14 G HN 8.349  | 23 F CA 57.733 | TSSFSQPATS                      | 8 F N 120.061  |
| 14 G N 111.204 | 23 F CB 39.394 | TSTGFGFGTS                      | 9 G CA 45.376  |
| 15 S CA 58.449 | 23 F HA 4.615  |                                 | 9 G HA2 3.878  |
| 15 S CB 63.936 | 23 F HN 8.409  | 1 S CA 58.555                   | 9 G HA3 3.942  |
| 15 S HA 4.473  | 23 F N 120.087 | 1 S CB 63.637                   | 9 G HN 8.326   |
| 15 S HN 8.277  | 24 G CA 45.396 | 1 S HA 4.408                    | 9 G N 110.253  |
| 15 S N 115.805 | 24 G HA2 3.856 | 1 S HN 8.489                    | 10 N CA 53.245 |
| 16 S CA 58.597 | 24 G HA3 3.907 | 1 S N 121.8                     | 10 N CB 39.008 |

|                |                |                |                                 |
|----------------|----------------|----------------|---------------------------------|
| 10 N HA 4.776  | 19 F CB 39.492 | 28 A CA 52.615 | 36 G HA3 3.849                  |
| 10 N HN 8.431  | 19 F HA 4.567  | 28 A CB 19.161 | 36 G HN 8.432                   |
| 10 N N 118.985 | 19 F HN 8.443  | 28 A HA 4.35   | 36 G N 111.046                  |
| 11 S CA 58.555 | 19 F N 120.715 | 28 A HN 8.667  | 37 F CA 58.1                    |
| 11 S CB 63.8   | 20 G CA 45.456 | 28 A N 125.037 | 37 F CB 39.572                  |
| 11 S HA 4.413  | 20 G HA2 3.889 | 29 T CA 61.675 | 37 F HA 4.608                   |
| 11 S HN 8.486  | 20 G HA3 3.978 | 29 T CB 70.034 | 37 F HN 8.242                   |
| 11 S N 116.418 | 20 G HN 8.313  | 29 T HA 4.372  | 37 F N 120.416                  |
| 12 Q CA 55.97  | 20 G N 110.858 | 29 T HN 8.294  | 38 G CA 45.41                   |
| 12 Q CB 29.446 | 21 T CA 61.841 | 29 T N 113.448 | 38 G HA2 3.883                  |
| 12 Q HA 4.392  | 21 T CB 70.061 | 30 S CA 58.368 | 38 G HA3 4                      |
| 12 Q HN 8.556  | 21 T HA 4.414  | 30 S CB 63.823 | 38 G HN 8.578                   |
| 12 Q N 121.965 | 21 T HN 8.178  | 30 S HA 4.53   | 38 G N 111.313                  |
| 13 T CA 62.131 | 21 T N 113.337 | 30 S HN 8.499  | 39 T CA 61.85                   |
| 13 T CB 69.781 | 22 S CA 58.564 | 30 S N 118.151 | 39 T CB 69.866                  |
| 13 T HA 4.278  | 22 S CB 63.825 | 31 T CA 61.913 | 39 T HA 4.415                   |
| 13 T HN 8.254  | 22 S HA 4.497  | 31 T CB 69.786 | 39 T HN 8.237                   |
| 13 T N 115.915 | 22 S HN 8.56   | 31 T HA 4.41   | 39 T N 113.637                  |
| 14 K CA 54.241 | 22 S N 118.242 | 31 T HN 8.362  | 40 S CA 58.37                   |
| 14 K CB 32.533 | 23 S CA 58.877 | 31 T N 115.779 | 40 S CB 63.832                  |
| 14 K HA 4.61   | 23 S CB 63.699 | 32 S CA 58.472 | 40 S HA 4.433                   |
| 14 K HN 8.471  | 23 S HA 4.414  | 32 S CB 63.745 | 40 S HN 8.458                   |
| 14 K N 125.719 | 23 S HN 8.413  | 32 S HA 4.498  | 40 S N 118.793                  |
| 15 P CA 63.493 | 23 S N 117.908 | 32 S HN 8.446  |                                 |
| 15 P CB 32.136 | 24 F CA 57.856 | 32 S N 118.424 | <b>Nup98</b> <sup>FG72-99</sup> |
| 15 P HA 4.415  | 24 F CB 39.62  | 33 T CA 62.001 | ATSTSTGFGF                      |
| 16 G CA 45.456 | 24 F HA 4.636  | 33 T CB 69.795 | GTSTGTANTL                      |
| 16 G HA2 3.959 | 24 F HN 8.262  | 33 T HA 4.333  | FGTASTGT                        |
| 16 G HA3 3.987 | 24 F N 122.216 | 33 T HN 8.273  |                                 |
| 16 G HN 8.673  | 25 S CA 58.008 | 33 T N 115.545 | 1 A CA 52.665                   |
| 16 G N 110.149 | 25 S CB 63.863 | 34 G CA 45.095 | 1 A CB 19.214                   |
| 17 G CA 45.393 | 25 S HA 4.394  | 34 G HA2 3.842 | 1 A HA 4.328                    |
| 17 G HA2 3.894 | 25 S HN 8.211  | 34 G HA3 3.941 | 1 A HN 8.466                    |
| 17 G HA3 3.939 | 25 S N 118.103 | 34 G HN 8.4    | 1 A N 130.162                   |
| 17 G HN 8.344  | 26 Q CA 53.667 | 34 G N 110.907 | 2 T CA 61.719                   |
| 17 G N 108.732 | 26 Q CB 28.972 | 35 F CA 58.168 | 2 T CB 69.979                   |
| 18 L CA 55.267 | 26 Q HA 4.568  | 35 F CB 39.569 | 2 T HA 4.418                    |
| 18 L CB 42.314 | 26 Q HN 8.417  | 35 F HA 4.562  | 2 T HN 8.364                    |
| 18 L HA 4.265  | 26 Q N 123.474 | 35 F HN 8.303  | 2 T N 113.292                   |
| 18 L HN 8.287  | 27 P CA 63.058 | 35 F N 120.447 | 3 S CA 58.406                   |
| 18 L N 121.693 | 27 P CB 32.207 | 36 G CA 45.08  | 3 S CB 63.735                   |
| 19 F CA 57.939 | 27 P HA 4.402  | 36 G HA2 3.707 | 3 S HA 4.519                    |



|                |                |                |                                  |
|----------------|----------------|----------------|----------------------------------|
| 3 S HN 8.5     | 12 T CA 61.836 | 20 L HA 4.283  | 28 T N 113.699                   |
| 3 S N 118.18   | 12 T CB 69.844 | 20 L HN 8.278  |                                  |
| 4 T CA 61.486  | 12 T HA 4.42   | 20 L N 124.2   | <b>Nup98</b> <sup>FG95-124</sup> |
| 4 T CB 69.895  | 12 T HN 8.172  | 21 F CA 57.956 | ASTGTSLFSS                       |
| 4 T HA 4.412   | 12 T N 113.524 | 21 F CB 39.558 | QNNFAQNKP                        |
| 4 T HN 8.365   | 13 S CA 58.415 | 21 F HA 4.617  | TGFGNFGTST                       |
| 4 T N 115.728  | 13 S CB 63.687 | 21 F HN 8.3    |                                  |
| 5 S CA 58.439  | 13 S HA 4.56   | 21 F N 120.864 | 1 A CA 52.639                    |
| 5 S CB 63.699  | 13 S HN 8.593  | 22 G CA 45.352 | 1 A CB 19.306                    |
| 5 S HA 4.5     | 13 S N 118.47  | 22 G HA2 3.899 | 1 A HA 4.305                     |
| 5 S HN 8.446   | 14 T CA 62.108 | 22 G HA3 3.975 | 1 A HN 8.457                     |
| 5 S N 118.381  | 14 T CB 69.844 | 22 G HN 8.368  | 1 A N 130.118                    |
| 6 T CA 62.041  | 14 T HA 4.375  | 22 G N 110.846 | 2 S CA 58.276                    |
| 6 T CB 69.854  | 14 T HN 8.356  | 23 T CA 61.898 | 2 S CB 63.701                    |
| 6 T HA 4.33    | 14 T N 115.665 | 23 T CB 69.95  | 2 S HA 4.547                     |
| 6 T HN 8.275   | 15 G CA 45.391 | 23 T HA 4.336  | 2 S HN 8.615                     |
| 6 T N 115.545  | 15 G HA2 4.012 | 23 T HN 8.174  | 2 S N 115.500                    |
| 7 G CA 45.052  | 15 G HA3 4.012 | 23 T N 114.755 | 3 T CA 62.017                    |
| 7 G HA2 3.841  | 15 G HN 8.486  | 24 A CA 52.619 | 3 T CB 69.775                    |
| 7 G HA3 3.938  | 15 G N 111.324 | 24 A CB 19.204 | 3 T HA 4.389                     |
| 7 G HN 8.396   | 16 T CA 61.932 | 24 A HA 4.369  | 3 T HN 8.346                     |
| 7 G N 110.885  | 16 T CB 69.927 | 24 A HN 8.537  | 3 T N 115.646                    |
| 8 F CA 58.19   | 16 T HA 4.334  | 24 A N 126.78  | 4 G CA 45.447                    |
| 8 F CB 39.551  | 16 T HN 8.192  | 25 S CA 58.439 | 4 G HA2 4.039                    |
| 8 F HA 4.561   | 16 T N 114.013 | 25 S CB 63.773 | 4 G HA3 4.039                    |
| 8 F HN 8.292   | 17 A CA 52.815 | 25 S HA 4.5    | 4 G HN 8.555                     |
| 8 F N 120.415  | 17 A CB 19.172 | 25 S HN 8.495  | 4 G N 111.257                    |
| 9 G CA 45.057  | 17 A HA 4.301  | 25 S N 115.679 | 5 T CA 61.935                    |
| 9 G HA2 3.714  | 17 A HN 8.511  | 26 T CA 62.06  | 5 T CB 69.879                    |
| 9 G HA3 3.852  | 17 A N 126.603 | 26 T CB 69.864 | 5 T HA 4.377                     |
| 9 G HN 8.435   | 18 N CA 53.345 | 26 T HA 4.385  | 5 T HN 8.229                     |
| 9 G N 111.001  | 18 N CB 38.768 | 26 T HN 8.316  | 5 T N 113.941                    |
| 10 F CA 58.1   | 18 N HA 4.712  | 26 T N 115.631 | 6 S CA 58.450                    |
| 10 F CB 39.557 | 18 N HN 8.532  | 27 G CA 45.406 | 6 S CB 63.749                    |
| 10 F HA 4.607  | 18 N N 118.253 | 27 G HA2 4.037 | 6 S HA 4.452                     |
| 10 F HN 8.232  | 19 T CA 62.097 | 27 G HA3 4.037 | 6 S HN 8.523                     |
| 10 F N 120.417 | 19 T CB 69.807 | 27 G HN 8.528  | 6 S N 118.780                    |
| 11 G CA 45.365 | 19 T HA 4.27   | 27 G N 111.323 | 7 L CA 55.562                    |
| 11 G HA2 3.9   | 19 T HN 8.177  | 28 T CA 61.544 | 7 L CB 42.142                    |
| 11 G HA3 3.996 | 19 T N 114.057 | 28 T CB 69.752 | 7 L HA 4.274                     |
| 11 G HN 8.565  | 20 L CA 55.344 | 28 T HA 4.321  | 7 L HN 8.417                     |
| 11 G N 111.241 | 20 L CB 42.161 | 28 T HN 8.214  | 7 L N 124.461                    |

|                |                |                                   |                |
|----------------|----------------|-----------------------------------|----------------|
| 8 F CA 57.974  | 16 A HA 4.245  | 25 N CB 38.720                    | 2 G HA3 3.909  |
| 8 F CB 39.669  | 16 A HN 8.104  | 25 N HA 4.675                     | 2 G HN 8.529   |
| 8 F HA 4.621   | 16 A N 124.857 | 25 N HN 8.267                     | 2 G N 111.069  |
| 8 F HN 8.303   | 17 Q CA 55.866 | 25 N N 118.797                    | 3 F CA 58.009  |
| 8 F N 120.449  | 17 Q CB 29.354 | 26 F CA 58.033                    | 3 F CB 39.598  |
| 9 S CA 58.344  | 17 Q HA 4.266  | 26 F CB 39.374                    | 3 F HA 4.628   |
| 9 S CB 63.819  | 17 Q HN 8.351  | 26 F HA 4.635                     | 3 F HN 8.275   |
| 9 S HA 4.435   | 17 Q N 119.131 | 26 F HN 8.432                     | 3 F N 120.143  |
| 9 S HN 8.251   | 18 N CA 52.965 | 26 F N 120.971                    | 4 G CA 45.23   |
| 9 S N 117.345  | 18 N CB 38.794 | 27 G CA 45.381                    | 4 G HA2 3.746  |
| 10 S CA 58.883 | 18 N HA 4.669  | 27 G HA2 3.937                    | 4 G HA3 3.852  |
| 10 S CB 63.631 | 18 N HN 8.492  | 27 G HA3 4.000                    | 4 G HN 8.45    |
| 10 S HA 4.417  | 18 N N 119.672 | 27 G HN 8.487                     | 4 G N 110.668  |
| 10 S HN 8.494  | 19 K CA 54.251 | 27 G N 110.648                    | 5 N CA 53.004  |
| 10 S N 118.378 | 19 K CB 32.498 | 28 T CA 61.752                    | 5 N CB 38.732  |
| 11 Q CA 56.203 | 19 K HA 4.576  | 28 T CB 69.947                    | 5 N HA 4.663   |
| 11 Q CB 29.275 | 19 K HN 8.351  | 28 T HA 4.421                     | 5 N HN 8.263   |
| 11 Q HA 4.306  | 19 K N 122.840 | 28 T HN 8.187                     | 5 N N 118.733  |
| 11 Q HN 8.425  | 20 P CA 63.124 | 28 T N 113.586                    | 6 F CA 57.989  |
| 11 Q N 121.699 | 20 P CB 32.164 | 29 S CA 58.468                    | 6 F CB 39.37   |
| 12 N CA 53.322 | 20 P HA 4.487  | 29 S CB 63.684                    | 6 F HA 4.628   |
| 12 N CB 38.742 | 21 T CA 62.171 | 29 S HA 4.559                     | 6 F HN 8.407   |
| 12 N HA 4.664  | 21 T CB 69.908 | 29 S HN 8.599                     | 6 F N 120.883  |
| 12 N HN 8.431  | 21 T HA 4.281  | 29 S N 118.602                    | 7 G CA 45.368  |
| 12 N N 119.555 | 21 T HN 8.448  | 30 T CA 61.650                    | 7 G HA2 3.928  |
| 13 N CA 53.372 | 21 T N 114.782 | 30 T CB 69.645                    | 7 G HA3 3.99   |
| 13 N CB 38.774 | 22 G CA 45.111 | 30 T HA 4.332                     | 7 G HN 8.46    |
| 13 N HA 4.654  | 22 G HA2 3.854 | 30 T HN 8.318                     | 7 G N 110.566  |
| 13 N HN 8.440  | 22 G HA3 3.947 | 30 T N 116.226                    | 8 T CA 61.768  |
| 13 N N 119.728 | 22 G HN 8.465  |                                   | 8 T CB 69.981  |
| 14 A CA 53.181 | 22 G N 111.133 | <b>Nup98</b> <sup>FG115-144</sup> | 8 T HA 4.424   |
| 14 A CB 18.839 | 23 F CA 58.048 | TGFGNFGTST                        | 8 T HN 8.179   |
| 14 A HA 4.181  | 23 F CB 39.505 | SSGGLFGTTN                        | 8 T N 113.405  |
| 14 A HN 8.314  | 23 F HA 4.607  | TTSNPFGSTS                        | 9 S CA 58.577  |
| 14 A N 124.125 | 23 F HN 8.303  |                                   | 9 S CB 63.873  |
| 15 F CA 57.731 | 23 F N 120.270 | 1 T CA 62.117                     | 9 S HA 4.564   |
| 15 F CB 39.218 | 24 G CA 45.205 | 1 T CB 69.826                     | 9 S HN 8.563   |
| 15 F HA 4.572  | 24 G HA2 3.729 | 1 T HA 4.272                      | 9 S N 118.356  |
| 15 F HN 8.167  | 24 G HA3 3.851 | 1 T HN 8.349                      | 10 T CA 61.918 |
| 15 F N 118.624 | 24 G HN 8.458  | 1 T N 119.179                     | 10 T CB 69.75  |
| 16 A CA 52.644 | 24 G N 111.023 | 2 G CA 45.156                     | 10 T HA 4.422  |
| 16 A CB 19.173 | 25 N CA 53.033 | 2 G HA2 3.836                     | 10 T HN 8.385  |

|                |                |                                   |                |
|----------------|----------------|-----------------------------------|----------------|
| 10 T N 115.744 | 19 T CB 69.866 | 28 S HA 4.549                     | 6 S CB 63.958  |
| 11 S CA 58.497 | 19 T HA 4.39   | 28 S HN 8.34                      | 6 S HA 4.547   |
| 11 S CB 63.827 | 19 T HN 8.352  | 28 S N 115.756                    | 6 S HN 8.343   |
| 11 S HA 4.506  | 19 T N 116.282 | 29 T CA 61.918                    | 6 S N 115.401  |
| 11 S HN 8.439  | 20 N CA 53.346 | 29 T CB 69.719                    | 7 T CA 61.837  |
| 11 S N 118.168 | 20 N CB 38.873 | 29 T HA 4.45                      | 7 T CB 69.742  |
| 12 S CA 58.668 | 20 N HA 4.806  | 29 T HN 8.47                      | 7 T HA 4.453   |
| 12 S CB 63.822 | 20 N HN 8.644  | 29 T N 115.966                    | 7 T HN 8.459   |
| 12 S HA 4.481  | 20 N N 121.778 | 30 S CA 58.328                    | 7 T N 117.826  |
| 12 S HN 8.505  | 21 T CA 61.869 | 30 S CB 63.858                    | 8 S CA 58.808  |
| 12 S N 118.115 | 21 T CB 69.738 | 30 S HA 4.427                     | 8 S CB 63.738  |
| 13 G CA 45.407 | 21 T HA 4.426  | 30 S HN 8.373                     | 8 S HA 4.448   |
| 13 G HA2 3.98  | 21 T HN 8.349  | 30 S N 118.749                    | 8 S HN 8.46    |
| 13 G HA3 3.98  | 21 T N 114.773 |                                   | 8 S N 115.486  |
| 13 G HN 8.515  | 22 T CA 62.082 | <b>Nup98</b> <sup>FG137-170</sup> | 9 G CA 45.35   |
| 13 G N 110.987 | 22 T CB 69.816 | SNPFGSTSGS                        | 9 G HA2 3.982  |
| 14 G CA 45.175 | 22 T HA 4.379  | LFGPSSFTAA                        | 9 G HA3 3.982  |
| 14 G HA2 3.906 | 22 T HN 8.312  | PTGTTIKFNP                        | 9 G HN 8.548   |
| 14 G HA3 3.906 | 22 T N 116.228 | PTGT                              | 9 G N 110.973  |
| 14 G HN 8.299  | 23 S CA 58.428 |                                   | 10 S CA 58.368 |
| 14 G N 108.726 | 23 S CB 63.739 | 1 S CA 58.42                      | 10 S CB 63.842 |
| 15 L CA 55.275 | 23 S HA 4.428  | 1 S CB 63.833                     | 10 S HA 4.415  |
| 15 L CB 42.292 | 23 S HN 8.409  | 1 S HA 4.387                      | 10 S HN 8.262  |
| 15 L HA 4.256  | 23 S N 118.239 | 1 S HN 8.438                      | 10 S N 115.374 |
| 15 L HN 8.213  | 24 N CB 38.884 | 1 S N 121.421                     | 11 L CA 55.446 |
| 15 L N 121.712 | 24 N HN 8.528  | 2 N CB 38.87                      | 11 L CB 42.166 |
| 16 F CA 57.921 | 24 N N 121.452 | 2 N HN 8.681                      | 11 L HA 4.262  |
| 16 F CB 39.462 | 25 P CA 63.682 | 2 N N 120.971                     | 11 L HN 8.37   |
| 16 F HA 4.626  | 25 P CB 31.901 | 3 P CA 63.678                     | 11 L N 123.868 |
| 16 F HN 8.432  | 25 P HA 4.334  | 3 P CB 31.895                     | 12 F CA 57.377 |
| 16 F N 120.593 | 26 F CA 57.87  | 3 P HA 4.331                      | 12 F CB 39.886 |
| 17 G CA 45.368 | 26 F CB 39.02  | 4 F CA 57.86                      | 12 F HA 4.697  |
| 17 G HA2 3.929 | 26 F HA 4.634  | 4 F CB 39.032                     | 12 F HN 8.237  |
| 17 G HA3 3.976 | 26 F HN 8.334  | 4 F HA 4.634                      | 12 F N 119.508 |
| 17 G HN 8.336  | 26 F N 119.545 | 4 F HN 8.34                       | 13 G CA 44.646 |
| 17 G N 110.636 | 27 G CA 45.343 | 4 F N 119.158                     | 13 G HA2 4.059 |
| 18 T CA 61.807 | 27 G HA2 3.889 | 5 G CA 45.383                     | 13 G HA3 4.093 |
| 18 T CB 70.018 | 27 G HA3 3.971 | 5 G HA2 3.898                     | 13 G HN 8.228  |
| 18 T HA 4.457  | 27 G HN 8.162  | 5 G HA3 3.969                     | 13 G N 110.081 |
| 18 T HN 8.185  | 27 G N 110.507 | 5 G HN 8.16                       | 14 P CA 63.501 |
| 18 T N 113.41  | 28 S CA 58.419 | 5 G N 110.079                     | 14 P CB 32.168 |
| 19 T CA 61.952 | 28 S CB 63.893 | 6 S CA 58.408                     | 14 P HA 4.427  |

|                |                |                                   |                |
|----------------|----------------|-----------------------------------|----------------|
| 15 S CA 58.515 | 23 G N 111.172 | 33 G HA3 4.049                    | 7 D CB 40.986  |
| 15 S CB 63.765 | 24 T CA 61.932 | 33 G HN 8.606                     | 7 D HA 4.678   |
| 15 S HA 4.467  | 24 T CB 69.786 | 33 G N 111.324                    | 7 D HN 8.6     |
| 15 S HN 8.613  | 24 T HA 4.423  | 34 T CA 61.635                    | 7 D N 122.964  |
| 15 S N 115.643 | 24 T HN 8.239  | 34 T CB 69.899                    | 8 T CA 62.305  |
| 16 S CA 58.568 | 24 T N 113.872 | 34 T HA 4.332                     | 8 T CB 69.542  |
| 16 S CB 63.825 | 25 T CA 62.138 | 34 T HN 8.235                     | 8 T HA 4.284   |
| 16 S HA 4.403  | 25 T CB 69.848 | 34 T N 113.388                    | 8 T HN 8.218   |
| 16 S HN 8.341  | 25 T HA 4.348  |                                   | 8 T N 114.606  |
| 16 S N 117.49  | 25 T HN 8.389  | <b>Nup98</b> <sup>FG165-204</sup> | 9 M CA 55.765  |
| 17 F CA 57.851 | 25 T N 117.666 | NPPTGTDTMV                        | 9 M CB 32.646  |
| 17 F CB 39.742 | 26 I CA 61.104 | KAGVSTNIST                        | 9 M HA 4.475   |
| 17 F HA 4.685  | 26 I CB 38.562 | KHQCTAMKE                         | 9 M HN 8.43    |
| 17 F HN 8.284  | 26 I HA 4.1    | YESKSLEELR                        | 9 M N 122.962  |
| 17 F N 121.853 | 26 I HN 8.365  |                                   | 10 V CA 62.669 |
| 18 T CA 61.627 | 26 I N 124.575 | 1 N CA 51.494                     | 10 V CB 32.635 |
| 18 T CB 70.004 | 27 K CA 55.966 | 1 N CB 38.354                     | 10 V HA 4.042  |
| 18 T HA 4.242  | 27 K CB 33.244 | 1 N HA 4.97                       | 10 V HN 8.262  |
| 18 T HN 8.124  | 27 K HA 4.285  | 1 N HN 8.572                      | 10 V N 120.494 |
| 18 T N 117.146 | 27 K HN 8.482  | 1 N N 125.768                     | 11 K CA 56.116 |
| 19 A CA 52.14  | 27 K N 126.4   | 2 P CA 63.19                      | 11 K CB 33.119 |
| 19 A CB 19.317 | 28 F CA 57.419 | 2 P CB 32.061                     | 11 K HA 4.312  |
| 19 A HA 4.25   | 28 F CB 39.921 | 2 P HA 4.479                      | 11 K HN 8.557  |
| 19 A HN 8.372  | 28 F HA 4.615  | 3 P CA 63.013                     | 11 K N 126.5   |
| 19 A N 127.251 | 28 F HN 8.461  | 3 P CB 32.105                     | 12 A CA 52.666 |
| 20 A CA 50.481 | 28 F N 122.747 | 3 P HA 4.534                      | 12 A CB 19.208 |
| 20 A CB 17.929 | 29 N CB 39.034 | 4 T CA 62.101                     | 12 A HA 4.292  |
| 20 A HA 4.546  | 29 N HN 8.53   | 4 T CB 70.027                     | 12 A HN 8.526  |
| 20 A HN 8.44   | 29 N N 123.627 | 4 T HA 4.358                      | 12 A N 126.354 |
| 20 A N 125.13  | 30 P CA 61.488 | 4 T HN 8.48                       | 13 G CA 45.181 |
| 21 P CA 63.064 | 30 P CB 30.894 | 4 T N 114.75                      | 13 G HA2 3.953 |
| 21 P CB 32.108 | 30 P HA 4.544  | 5 G CA 45.398                     | 13 G HA3 4.001 |
| 21 P HA 4.497  | 31 P CA 63.047 | 5 G HA2 4.062                     | 13 G HN 8.538  |
| 22 T CA 62.047 | 31 P CB 32.093 | 5 G HA3 4.062                     | 13 G N 108.833 |
| 22 T CB 69.962 | 31 P HA 4.5    | 5 G HN 8.614                      | 14 V CA 62.243 |
| 22 T HA 4.341  | 32 T CA 62.102 | 5 G N 111.492                     | 14 V CB 32.92  |
| 22 T HN 8.456  | 32 T CB 69.908 | 6 T CA 61.885                     | 14 V HA 4.191  |
| 22 T N 114.504 | 32 T HA 4.317  | 6 T CB 69.651                     | 14 V HN 8.127  |
| 23 G CA 45.337 | 32 T HN 8.422  | 6 T HA 4.361                      | 14 V N 119.671 |
| 23 G HA2 4.037 | 32 T N 114.473 | 6 T HN 8.277                      | 15 S CA 58.335 |
| 23 G HA3 4.037 | 33 G CA 45.339 | 6 T N 113.71                      | 15 S CB 63.62  |
| 23 G HN 8.592  | 33 G HA2 4.049 | 7 D CA 54.586                     | 15 S HA 4.563  |

|                |                |                |                                   |
|----------------|----------------|----------------|-----------------------------------|
| 15 S HN 8.676  | 24 C CA 58.641 | 32 E HA 4.248  | 40 R N 121.262                    |
| 15 S N 120.24  | 24 C CB 27.892 | 32 E HN 8.302  |                                   |
| 16 T CA 61.963 | 24 C HA 4.52   | 32 E N 122.819 | <b>Nup98</b> <sup>FG189-218</sup> |
| 16 T CB 69.733 | 24 C HN 8.684  | 33 S CA 58.823 | ITAMKEYESK                        |
| 16 T HA 4.36   | 24 C N 122.012 | 33 S CB 63.761 | SLEELRLEDY                        |
| 16 T HN 8.384  | 25 I CA 61.67  | 33 S HA 4.382  | QANRKGPQNQ                        |
| 16 T N 116.293 | 25 I CB 38.633 | 33 S HN 8.431  |                                   |
| 17 N CA 53.364 | 25 I HA 4.244  | 33 S N 117.409 | 1 I CA 61.675                     |
| 17 N CB 38.76  | 25 I HN 8.574  | 34 K CA 56.634 | 1 I CB 38.753                     |
| 17 N HA 4.743  | 25 I N 122.123 | 34 K CB 33.175 | 1 I HA 4.174                      |
| 17 N HN 8.559  | 26 T CA 62.248 | 34 K HA 4.364  | 1 I HN 8.368                      |
| 17 N N 121.577 | 26 T CB 69.684 | 34 K HN 8.456  | 1 I N 126.243                     |
| 18 I CA 61.369 | 26 T HA 4.271  | 34 K N 123.725 | 2 T CA 62.022                     |
| 18 I CB 38.678 | 26 T HN 8.321  | 35 S CA 58.605 | 2 T CB 69.828                     |
| 18 I HA 4.211  | 26 T N 119.07  | 35 S CB 63.882 | 2 T HA 4.311                      |
| 18 I HN 8.29   | 27 A CA 52.691 | 35 S HA 4.397  | 2 T HN 8.356                      |
| 18 I N 121.675 | 27 A CB 19.147 | 35 S HN 8.536  | 2 T N 118.699                     |
| 19 S CA 58.49  | 27 A HA 4.321  | 35 S N 117.303 | 3 A CA 52.615                     |
| 19 S CB 63.753 | 27 A HN 8.418  | 36 L CA 56.47  | 3 A CB 19.182                     |
| 19 S HA 4.529  | 27 A N 126.824 | 36 L CB 41.868 | 3 A HA 4.315                      |
| 19 S HN 8.593  | 28 M CA 55.776 | 36 L HA 4.245  | 3 A HN 8.435                      |
| 19 S N 120.226 | 28 M CB 32.824 | 36 L HN 8.455  | 3 A N 126.768                     |
| 20 T CA 62.098 | 28 M HA 4.425  | 36 L N 123.524 | 4 M CA 55.674                     |
| 20 T CB 69.684 | 28 M HN 8.406  | 37 E CA 57.964 | 4 M CB 32.876                     |
| 20 T HA 4.322  | 28 M N 120.194 | 37 E CB 29.794 | 4 M HA 4.425                      |
| 20 T HN 8.351  | 29 K CA 56.585 | 37 E HA 4.109  | 4 M HN 8.441                      |
| 20 T N 116.733 | 29 K CB 32.939 | 37 E HN 8.393  | 4 M N 120.134                     |
| 21 K CA 55.921 | 29 K HA 4.25   | 37 E N 120.151 | 5 K CA 56.545                     |
| 21 K CB 32.899 | 29 K HN 8.47   | 38 E CA 57.448 | 5 K CB 32.966                     |
| 21 K HA 4.264  | 29 K N 123.149 | 38 E CB 30.036 | 5 K HA 4.253                      |
| 21 K HN 8.336  | 30 E CA 57.065 | 38 E HA 4.168  | 5 K HN 8.481                      |
| 21 K N 123.575 | 30 E CB 30.106 | 38 E HN 8.277  | 5 K N 123.148                     |
| 22 H CA 55.612 | 30 E HA 4.2    | 38 E N 121.241 | 6 E CA 56.861                     |
| 22 H CB 29.378 | 30 E HN 8.574  | 39 L CA 55.884 | 6 E CB 30.298                     |
| 22 H HA 4.661  | 30 E N 124.499 | 39 L CB 42.081 | 6 E HA 4.191                      |
| 22 H HN 8.625  | 31 Y CA 58.38  | 39 L HA 4.27   | 6 E HN 8.598                      |
| 22 H N 120.294 | 31 Y CB 38.737 | 39 L HN 8.228  | 6 E N 122.013                     |
| 23 Q CA 55.929 | 31 Y HA 4.506  | 39 L N 122.156 | 7 Y CA 58.289                     |
| 23 Q CB 29.649 | 31 Y HN 8.263  | 40 R CA 56.541 | 7 Y CB 38.774                     |
| 23 Q HA 4.334  | 31 Y N 122.832 | 40 R CB 30.795 | 7 Y HA 4.504                      |
| 23 Q HN 8.594  | 32 E CA 56.646 | 40 R HA 4.245  | 7 Y HN 8.269                      |
| 23 Q N 122.562 | 32 E CB 30.492 | 40 R HN 8.171  | 7 Y N 120.244                     |

|                |                |                                   |                |
|----------------|----------------|-----------------------------------|----------------|
| 8 E CA 56.545  | 16 R HA 4.253  | 24 R N 120.543                    | 2 E CB 30.089  |
| 8 E CB 30.537  | 16 R HN 8.316  | 25 K CA 56.48                     | 2 E HA 4.214   |
| 8 E HA 4.253   | 16 R N 121.188 | 25 K CB 33.24                     | 2 E HN 8.614   |
| 8 E HN 8.307   | 17 L CA 56.64  | 25 K HA 4.378                     | 2 E N 121.221  |
| 8 E N 122.585  | 17 L CB 42.005 | 25 K HN 8.374                     | 3 D CA 54.346  |
| 9 S CA 58.661  | 17 L HA 4.246  | 25 K N 121.821                    | 3 D CB 40.937  |
| 9 S CB 63.716  | 17 L HN 8.185  | 26 G CA 44.62                     | 3 D HA 4.547   |
| 9 S HA 4.39    | 17 L N 122.032 | 26 G HA2 4.084                    | 3 D HN 8.391   |
| 9 S HN 8.422   | 18 E CA 58.14  | 26 G HA3 4.124                    | 3 D N 121.739  |
| 9 S N 117.207  | 18 E CB 30.462 | 26 G HN 8.338                     | 4 Y CA 58.914  |
| 10 K CA 56.645 | 18 E HA 4.146  | 26 G N 109.731                    | 4 Y CB 38.261  |
| 10 K CB 33.609 | 18 E HN 8.364  | 27 P CA 63.439                    | 4 Y HA 4.442   |
| 10 K HA 4.388  | 18 E N 119.793 | 27 P CB 32.151                    | 4 Y HN 8.276   |
| 10 K HN 8.413  | 19 D CA 55.562 | 27 P HA 4.418                     | 4 Y N 121.696  |
| 10 K N 123.581 | 19 D CB 40.969 | 28 Q CA 55.761                    | 5 Q CA 56.11   |
| 11 S CA 58.244 | 19 D HA 4.534  | 28 Q CB 29.361                    | 5 Q CB 29.164  |
| 11 S CB 64.52  | 19 D HN 8.201  | 28 Q HA 4.32                      | 5 Q HA 4.151   |
| 11 S HA 4.411  | 19 D N 120.394 | 28 Q HN 8.784                     | 5 Q HN 8.246   |
| 11 S HN 8.7    | 20 Y CA 59.677 | 28 Q N 120.279                    | 5 Q N 121.406  |
| 11 S N 117.719 | 20 Y CB 38.32  | 29 N CA 53.39                     | 6 A CA 53.349  |
| 12 L CA 56.992 | 20 Y HA 4.388  | 29 N CB 38.693                    | 6 A CB 18.919  |
| 12 L CB 41.796 | 20 Y HN 8.181  | 29 N HA 4.681                     | 6 A HA 4.144   |
| 12 L HA 4.193  | 20 Y N 120.768 | 29 N HN 8.572                     | 6 A HN 8.149   |
| 12 L HN 8.555  | 21 Q CA 56.664 | 29 N N 119.479                    | 6 A N 123.957  |
| 12 L N 122.592 | 21 Q CB 28.997 | 30 Q CA 55.78                     | 7 N CA 53.365  |
| 13 E CA 58.259 | 21 Q HA 4.097  | 30 Q CB 29.475                    | 7 N CB 38.52   |
| 13 E CB 29.806 | 21 Q HN 8.257  | 30 Q HA 4.283                     | 7 N HA 4.643   |
| 13 E HA 4.14   | 21 Q N 119.957 | 30 Q HN 8.543                     | 7 N HN 8.343   |
| 13 E HN 8.452  | 22 A CA 53.565 | 30 Q N 121.165                    | 7 N N 116.32   |
| 13 E N 119.631 | 22 A CB 18.833 |                                   | 8 R CA 56.363  |
| 14 E CA 58.13  | 22 A HA 4.161  | <b>Nup98</b> <sup>FG205-244</sup> | 8 R CB 30.607  |
| 14 E CB 30.099 | 22 A HN 8.112  | LEDYQANRKG                        | 8 R HA 4.287   |
| 14 E HA 4.105  | 22 A N 122.814 | PQNQVGAGTT                        | 8 R HN 8.153   |
| 14 E HN 8.169  | 23 N CA 53.48  | TGLFGSSPAT                        | 8 R N 121.223  |
| 14 E N 120.808 | 23 N CB 38.713 | SSATGLFSSS                        | 9 K CA 56.187  |
| 15 L CA 56.658 | 23 N HA 4.648  |                                   | 9 K CB 33.253  |
| 15 L CB 41.991 | 23 N HN 8.208  | 1 L CA 55.59                      | 9 K HA 4.375   |
| 15 L HA 4.172  | 23 N N 115.603 | 1 L CB 42.487                     | 9 K HN 8.428   |
| 15 L HN 8.276  | 24 R CA 56.664 | 1 L HA 4.272                      | 9 K N 122.446  |
| 15 L N 121.726 | 24 R CB 30.516 | 1 L HN 8.4                        | 10 G CA 44.607 |
| 16 R CA 56.545 | 24 R HA 4.262  | 1 L N 127.946                     | 10 G HA2 4.071 |
| 16 R CB 30.434 | 24 R HN 8.061  | 2 E CA 56.754                     | 10 G HA3 4.122 |

|                |                |                |                                   |
|----------------|----------------|----------------|-----------------------------------|
| 10 G HN 8.361  | 19 T HA 4.461  | 27 S N 119.092 | 37 F CB 39.535                    |
| 10 G N 110.195 | 19 T HN 8.202  | 28 P CA 63.351 | 37 F HA 4.66                      |
| 11 P CA 63.351 | 19 T N 113.741 | 28 P CB 32.134 | 37 F HN 8.429                     |
| 11 P CB 32.134 | 20 T CA 61.903 | 28 P HA 4.422  | 37 F N 121.002                    |
| 11 P HA 4.418  | 20 T CB 69.799 | 29 A CA 52.744 | 38 S CA 58.065                    |
| 12 Q CA 55.783 | 20 T HA 4.485  | 29 A CB 19.148 | 38 S CB 63.935                    |
| 12 Q CB 29.488 | 20 T HN 8.452  | 29 A HA 4.341  | 38 S HA 4.457                     |
| 12 Q HA 4.312  | 20 T N 116.472 | 29 A HN 8.556  | 38 S HN 8.268                     |
| 12 Q HN 8.773  | 21 T CA 62.108 | 29 A N 124.408 | 38 S N 117.626                    |
| 12 Q N 120.764 | 21 T CB 69.868 | 30 T CA 61.743 | 39 S CA 58.581                    |
| 13 N CA 53.384 | 21 T HA 4.361  | 30 T CB 69.913 | 39 S CB 63.745                    |
| 13 N CB 38.819 | 21 T HN 8.287  | 30 T HA 4.373  | 39 S HA 4.484                     |
| 13 N HA 4.669  | 21 T N 116.318 | 30 T HN 8.235  | 39 S HN 8.583                     |
| 13 N HN 8.541  | 22 G CA 45.307 | 30 T N 113.246 | 39 S N 118.709                    |
| 13 N N 119.658 | 22 G HA2 3.927 | 31 S CA 58.298 | 40 S CA 58.401                    |
| 14 Q CA 55.808 | 22 G HA3 3.927 | 31 S CB 63.852 | 40 S CB 63.852                    |
| 14 Q CB 29.514 | 22 G HN 8.486  | 31 S HA 4.525  | 40 S HA 4.438                     |
| 14 Q HA 4.361  | 22 G N 111.344 | 31 S HN 8.423  | 40 S HN 8.406                     |
| 14 Q HN 8.478  | 23 L CA 55.21  | 31 S N 118.123 | 40 S N 118.697                    |
| 14 Q N 120.94  | 23 L CB 42.356 | 32 S CA 58.463 |                                   |
| 15 V CA 62.79  | 23 L HA 4.272  | 32 S CB 63.883 | <b>Nup98</b> <sup>FG225-264</sup> |
| 15 V CB 32.645 | 23 L HN 8.177  | 32 S HA 4.475  | TGLFGSSPAT                        |
| 15 V HA 4.088  | 23 L N 121.662 | 32 S HN 8.536  | SSATGLFSSS                        |
| 15 V HN 8.403  | 24 F CA 57.996 | 32 S N 118.304 | TTNSGFAYGQ                        |
| 15 V N 122.421 | 24 F CB 39.37  | 33 A CA 52.915 | NKTAFGTSTT                        |
| 16 G CA 45.215 | 24 F HA 4.611  | 33 A CB 19.148 |                                   |
| 16 G HA2 3.955 | 24 F HN 8.506  | 33 A HA 4.402  | 1 T CA 62.26                      |
| 16 G HA3 3.955 | 24 F N 121.104 | 33 A HN 8.514  | 1 T CB 69.825                     |
| 16 G HN 8.679  | 25 G CA 45.267 | 33 A N 126.448 | 1 T HA 4.292                      |
| 16 G N 113.414 | 25 G HA2 3.878 | 34 T CA 62.038 | 1 T HN 8.392                      |
| 17 A CA 52.749 | 25 G HA3 3.955 | 34 T CB 69.919 | 1 T N 119.482                     |
| 17 A CB 19.351 | 25 G HN 8.394  | 34 T HA 4.336  | 2 G CA 45.362                     |
| 17 A HA 4.327  | 25 G N 111.067 | 34 T HN 8.193  | 2 G HA2 3.913                     |
| 17 A HN 8.387  | 26 S CA 58.276 | 34 T N 112.482 | 2 G HA3 3.913                     |
| 17 A N 124.283 | 26 S CB 64.066 | 35 G HN 8.398  | 2 G HN 8.634                      |
| 18 G CA 45.344 | 26 S HA 4.503  | 35 G N 111.081 | 2 G N 111.534                     |
| 18 G HA2 4.002 | 26 S HN 8.264  | 36 L CA 55.204 | 3 L CA 55.172                     |
| 18 G HA3 4.002 | 26 S N 115.698 | 36 L CB 42.362 | 3 L CB 42.251                     |
| 18 G HN 8.612  | 27 S CA 56.597 | 36 L HA 4.276  | 3 L HA 4.272                      |
| 18 G N 108.576 | 27 S CB 63.326 | 36 L HN 8.131  | 3 L HN 8.137                      |
| 19 T CA 61.885 | 27 S HA 4.804  | 36 L N 121.686 | 3 L N 121.574                     |
| 19 T CB 69.919 | 27 S HN 8.516  | 37 F CA 57.682 | 4 F CA 58.024                     |

|                |                |                |                |
|----------------|----------------|----------------|----------------|
| 4 F CB 39.239  | 13 A CA 52.919 | 21 T HA 4.437  | 29 G N 110.958 |
| 4 F HA 4.594   | 13 A CB 19.156 | 21 T HN 8.328  | 30 Q CA 55.907 |
| 4 F HN 8.5     | 13 A HA 4.399  | 21 T N 115.812 | 30 Q CB 29.41  |
| 4 F N 120.992  | 13 A HN 8.507  | 22 T CA 62.154 | 30 Q HA 4.285  |
| 5 G CA 45.29   | 13 A N 126.431 | 22 T CB 69.783 | 30 Q HN 8.237  |
| 5 G HA2 3.873  | 14 T CA 62.054 | 22 T HA 4.343  | 30 Q N 119.688 |
| 5 G HA3 3.955  | 14 T CB 69.894 | 22 T HN 8.229  | 31 N CA 53.36  |
| 5 G HN 8.39    | 14 T HA 4.331  | 22 T N 116.229 | 31 N CB 38.688 |
| 5 G N 111.073  | 14 T HN 8.188  | 23 N CA 53.323 | 31 N HA 4.638  |
| 6 S CA 58.272  | 14 T N 112.501 | 23 N CB 38.8   | 31 N HN 8.597  |
| 6 S CB 64.056  | 15 G CA 45.335 | 23 N HA 4.74   | 31 N N 119.68  |
| 6 S HA 4.497   | 15 G HA2 3.925 | 23 N HN 8.571  | 32 K CA 56.565 |
| 6 S HN 8.247   | 15 G HA3 3.925 | 23 N N 121.524 | 32 K CB 32.997 |
| 6 S N 115.685  | 15 G HN 8.39   | 24 S CA 58.893 | 32 K HA 4.323  |
| 7 S CA 56.597  | 15 G N 111.073 | 24 S CB 63.732 | 32 K HN 8.427  |
| 7 S CB 63.324  | 16 L CA 55.193 | 24 S HA 4.378  | 32 K N 122.052 |
| 7 S HA 4.801   | 16 L CB 42.348 | 24 S HN 8.441  | 33 T CA 61.897 |
| 7 S HN 8.512   | 16 L HA 4.273  | 24 S N 116.645 | 33 T CB 69.991 |
| 7 S N 119.068  | 16 L HN 8.125  | 25 G CA 45.279 | 33 T HA 4.276  |
| 8 P CA 63.372  | 16 L N 121.643 | 25 G HA2 3.853 | 33 T HN 8.249  |
| 8 P CB 32.122  | 17 F CA 57.668 | 25 G HA3 3.916 | 33 T N 115.227 |
| 8 P HA 4.416   | 17 F CB 39.592 | 25 G HN 8.48   | 34 A CA 52.481 |
| 9 A CA 52.744  | 17 F HA 4.66   | 25 G N 110.585 | 34 A CB 19.162 |
| 9 A CB 19.134  | 17 F HN 8.415  | 26 F CA 57.875 | 34 A HA 4.256  |
| 9 A HA 4.331   | 17 F N 120.972 | 26 F CB 39.729 | 34 A HN 8.378  |
| 9 A HN 8.554   | 18 S CA 58.118 | 26 F HA 4.541  | 34 A N 126.335 |
| 9 A N 124.374  | 18 S CB 63.964 | 26 F HN 8.115  | 35 F CA 58.053 |
| 10 T CA 61.73  | 18 S HA 4.455  | 26 F N 120.352 | 35 F CB 39.596 |
| 10 T CB 69.907 | 18 S HN 8.275  | 27 A CA 52.263 | 35 F HA 4.593  |
| 10 T HA 4.37   | 18 S N 117.617 | 27 A CB 19.159 | 35 F HN 8.321  |
| 10 T HN 8.229  | 19 S CA 58.513 | 27 A HA 4.255  | 35 F N 119.96  |
| 10 T N 113.213 | 19 S CB 63.811 | 27 A HN 8.295  | 36 G CA 45.299 |
| 11 S CA 58.312 | 19 S HA 4.493  | 27 A N 125.682 | 36 G HA2 3.895 |
| 11 S CB 63.938 | 19 S HN 8.53   | 28 Y CA 58.556 | 36 G HA3 3.969 |
| 11 S HA 4.518  | 19 S N 118.35  | 28 Y CB 38.605 | 36 G HN 8.39   |
| 11 S HN 8.415  | 20 S CA 58.64  | 28 Y HA 4.442  | 36 G N 111.073 |
| 11 S N 118.103 | 20 S CB 63.802 | 28 Y HN 8.161  | 37 T CA 61.81  |
| 12 S CA 58.477 | 20 S HA 4.543  | 28 Y N 119.881 | 37 T CB 69.748 |
| 12 S CB 63.815 | 20 S HN 8.495  | 29 G CA 45.385 | 37 T HA 4.416  |
| 12 S HA 4.472  | 20 S N 117.919 | 29 G HA2 3.795 | 37 T HN 8.161  |
| 12 S HN 8.53   | 21 T CA 62.09  | 29 G HA3 3.916 | 37 T N 113.706 |
| 12 S N 118.35  | 21 T CB 69.688 | 29 G HN 8.413  | 38 S CA 58.361 |



|                                  |                |                                  |               |
|----------------------------------|----------------|----------------------------------|---------------|
| 38 S CB 63.815                   | 5 G HN 8.412   | 14 N CB 38.743                   | FSKPFGQATT    |
| 38 S HA 4.581                    | 5 G N 110.841  | 14 N HN 8.694                    | TQNTGFSFGN    |
| 38 S HN 8.584                    | 6 T CA 61.808  | 14 N N 121.566                   |               |
| 38 S N 118.524                   | 6 T CB 70.038  | 15 P CA 63.96                    | 1 G CA 45.109 |
| 39 T CA 62.007                   | 6 T HA 4.403   | 15 P CB 31.923                   | 1 G HA2 3.809 |
| 39 T CB 69.625                   | 6 T HN 8.161   | 15 P HA 4.402                    | 1 G HA3 3.851 |
| 39 T HA 4.451                    | 6 T N 113.311  | 16 G CA 45.251                   | 1 G HN 8.321  |
| 39 T HN 8.484                    | 7 S CA 58.42   | 16 G HA2 3.938                   | 1 G N 114.231 |
| 39 T N 116.418                   | 7 S CB 63.81   | 16 G HA3 3.938                   | 2 F CA 58.075 |
| 40 T CA 61.696                   | 7 S HA 4.565   | 16 G HN 8.614                    | 2 F CB 39.467 |
| 40 T CB 70.002                   | 7 S HN 8.582   | 16 G N 108.995                   | 2 F HA 4.614  |
| 40 T HA 4.331                    | 7 S N 118.071  | 17 G CA 45.251                   | 2 F HN 8.38   |
| 40 T HN 8.2                      | 8 T CA 62.014  | 17 G HA2 3.912                   | 2 F N 120.048 |
| 40 T N 116.238                   | 8 T CB 69.598  | 17 G HA3 3.912                   | 3 G CA 45.301 |
|                                  | 8 T HA 4.434   | 17 G HN 8.221                    | 3 G HA2 3.869 |
| <b>Nup98<sup>FG256-275</sup></b> | 8 T HN 8.467   | 17 G N 108.298                   | 3 G HA3 3.987 |
| KTAFGTSTTG                       | 8 T N 115.878  | 18 L CA 55.296                   | 3 G HN 8.595  |
| FGTNPGLFG                        | 9 T CA 62.092  | 18 L CB 42.295                   | 3 G N 111.077 |
|                                  | 9 T CB 69.835  | 18 L HA 4.252                    | 4 T CA 61.822 |
| 1 K CA 56.637                    | 9 T HA 4.339   | 18 L HN 8.203                    | 4 T CB 69.783 |
| 1 K CB 33.214                    | 9 T HN 8.215   | 18 L N 121.339                   | 4 T HA 4.324  |
| 1 K HA 4.326                     | 9 T N 115.414  | 19 F CA 58.009                   | 4 T HN 8.132  |
| 1 K HN 8.476                     | 10 G CA 45.162 | 19 F CB 39.193                   | 4 T N 113.182 |
| 1 K N 126.971                    | 10 G HA2 3.835 | 19 F HA 4.592                    | 5 N CB 38.75  |
| 2 T CA 61.548                    | 10 G HA3 3.926 | 19 F HN 8.531                    | 5 N HA 4.982  |
| 2 T CB 70.089                    | 10 G HN 8.429  | 19 F N 120.836                   | 5 N HN 8.685  |
| 2 T HA 4.317                     | 10 G N 110.844 | 20 G CA 44.954                   | 5 N N 121.805 |
| 2 T HN 8.336                     | 11 F CA 58.104 | 20 G HA2 3.761                   | 6 P CA 63.947 |
| 2 T N 115.335                    | 11 F CB 39.616 | 20 G HA3 3.857                   | 6 P CB 31.93  |
| 3 A CA 52.417                    | 11 F HA 4.618  | 20 G HN 8.371                    | 6 P HA 4.401  |
| 3 A CB 19.212                    | 11 F HN 8.321  | 20 G N 112.107                   | 7 G CA 45.273 |
| 3 A HA 4.284                     | 11 F N 120.087 |                                  | 7 G HA2 3.94  |
| 3 A HN 8.445                     | 12 G CA 45.304 |                                  | 7 G HA3 3.94  |
| 3 A N 126.272                    | 12 G HA2 3.875 |                                  | 7 G HN 8.608  |
| 4 F CA 58.057                    | 12 G HA3 3.976 |                                  | 7 G N 109.209 |
| 4 F CB 39.628                    | 12 G HN 8.543  |                                  | 8 G CA 45.332 |
| 4 F HA 4.603                     | 12 G N 110.816 |                                  | 8 G HA2 3.908 |
| 4 F HN 8.37                      | 13 T CA 61.827 |                                  | 8 G HA3 3.908 |
| 4 F N 119.791                    | 13 T CB 69.876 | <b>Nup98<sup>FG265-304</sup></b> | 8 G HN 8.216  |
| 5 G CA 45.303                    | 13 T HA 4.319  | GFGTNPGLF                        | 8 G N 108.621 |
| 5 G HA2 3.876                    | 13 T HN 8.144  | GQQNQTTSL                        | 9 L CA 55.342 |
| 5 G HA3 3.977                    | 13 T N 112.978 |                                  | 9 L CB 42.239 |

|                |                |                |                                   |
|----------------|----------------|----------------|-----------------------------------|
| 9 L HA 4.255   | 17 T N 115.84  | 26 G HN 8.398  | 35 G CA 45.215                    |
| 9 L HN 8.2     | 18 T CA 62.031 | 26 G N 110.266 | 35 G HA2 3.86                     |
| 9 L N 121.602  | 18 T CB 69.766 | 27 Q CA 55.664 | 35 G HA3 3.933                    |
| 10 F CA 58.065 | 18 T HA 4.364  | 27 Q CB 29.716 | 35 G HN 8.507                     |
| 10 F CB 39.455 | 18 T HN 8.286  | 27 Q HA 4.316  | 35 G N 110.971                    |
| 10 F HA 4.598  | 18 T N 116.664 | 27 Q HN 8.233  | 36 F CA 57.877                    |
| 10 F HN 8.434  | 19 S CA 58.405 | 27 Q N 120.14  | 36 F CB 39.78                     |
| 10 F N 120.515 | 19 S CB 63.755 | 28 A CA 52.637 | 36 F HA 4.585                     |
| 11 G CA 45.338 | 19 S HA 4.436  | 28 A CB 19.235 | 36 F HN 8.2                       |
| 11 G HA2 3.837 | 19 S HN 8.478  | 28 A HA 4.378  | 36 F N 120.426                    |
| 11 G HA3 3.919 | 19 S N 118.608 | 28 A HN 8.58   | 37 S CA 57.918                    |
| 11 G HN 8.361  | 20 L CA 55.342 | 28 A N 126.059 | 37 S CB 63.792                    |
| 11 G N 110.542 | 20 L CB 42.172 | 29 T CA 61.83  | 37 S HA 4.382                     |
| 12 Q CA 56.088 | 20 L HA 4.254  | 29 T CB 69.766 | 37 S HN 8.26                      |
| 12 Q CB 29.341 | 20 L HN 8.356  | 29 T HA 4.414  | 37 S N 117.91                     |
| 12 Q HA 4.305  | 20 L N 122.579 | 29 T HN 8.383  | 38 F CA 58.184                    |
| 12 Q HN 8.317  | 21 F CA 57.535 | 29 T N 114.079 | 38 F CB 39.505                    |
| 12 Q N 119.905 | 21 F CB 39.541 | 30 T CA 61.712 | 38 F HA 4.557                     |
| 13 Q CA 56.088 | 21 F HA 4.652  | 30 T CB 69.89  | 38 F HN 8.52                      |
| 13 Q CB 29.285 | 21 F HN 8.233  | 30 T HA 4.462  | 38 F N 121.15                     |
| 13 Q HA 4.303  | 21 F N 120.14  | 30 T HN 8.337  | 39 G CA 45.366                    |
| 13 Q HN 8.642  | 22 S CA 58.105 | 30 T N 116.343 | 39 G HA2 3.817                    |
| 13 Q N 121.414 | 22 S CB 63.869 | 31 T CA 62.022 | 39 G HA3 3.936                    |
| 14 N CA 53.469 | 22 S HA 4.401  | 31 T CB 69.783 | 39 G HN 8.438                     |
| 14 N CB 38.704 | 22 S HN 8.167  | 31 T HA 4.329  | 39 G N 110.598                    |
| 14 N HA 4.672  | 22 S N 117.626 | 31 T HN 8.324  | 40 N CA 52.935                    |
| 14 N HN 8.591  | 23 K CA 54.384 | 31 T N 116.718 | 40 N CB 39.042                    |
| 14 N N 119.7   | 23 K CB 32.579 | 32 Q CA 55.877 | 40 N HA 4.697                     |
| 15 Q CA 56.088 | 23 K HA 4.56   | 32 Q CB 29.499 | 40 N HN 8.366                     |
| 15 Q CB 29.341 | 23 K HN 8.368  | 32 Q HA 4.333  | 40 N N 124.422                    |
| 15 Q HA 4.304  | 23 K N 119.714 | 32 Q HN 8.549  |                                   |
| 15 Q HN 8.511  | 24 P CA 63.169 | 32 Q N 123.004 | <b>Nup98</b> <sup>FG298-327</sup> |
| 15 Q N 120.79  | 24 P CB 32.052 | 33 N CA 53.232 | TGFSFGNTST                        |
| 16 Q CA 56.086 | 24 P HA 4.382  | 33 N CB 38.745 | IGQPSTNTMG                        |
| 16 Q CB 29.366 | 25 F CA 58.361 | 33 N HA 4.754  | LFGVTQASQP                        |
| 16 Q HA 4.38   | 25 F CB 39.528 | 33 N HN 8.663  |                                   |
| 16 Q HN 8.594  | 25 F HA 4.553  | 33 N N 120.671 | 1 T CA 62.157                     |
| 16 Q N 121.529 | 25 F HN 8.356  | 34 T CA 62.073 | 1 T CB 69.826                     |
| 17 T CA 62.055 | 25 F N 122.579 | 34 T CB 69.766 | 1 T HA 4.28                       |
| 17 T CB 69.766 | 26 G CA 45.228 | 34 T HA 4.312  | 1 T HN 8.363                      |
| 17 T HA 4.403  | 26 G HA2 3.792 | 34 T HN 8.296  | 1 T N 122.542                     |
| 17 T HN 8.394  | 26 G HA3 3.866 | 34 T N 114.386 | 2 G CA 45.225                     |

|                |                |                |                                   |
|----------------|----------------|----------------|-----------------------------------|
| 2 G HA2 3.845  | 10 T HN 8.381  | 19 M HA 4.487  | 27 A N 125.953                    |
| 2 G HA3 3.921  | 10 T N 116.638 | 19 M HN 8.452  | 28 S CA 58.388                    |
| 2 G HN 8.577   | 11 I CA 61.62  | 19 M N 122.341 | 28 S CB 63.769                    |
| 2 G N 111.174  | 11 I CB 38.518 | 20 G CA 45.327 | 28 S HA 4.413                     |
| 3 F CA 57.794  | 11 I HA 4.142  | 20 G HA2 3.899 | 28 S HN 8.434                     |
| 3 F CB 39.799  | 11 I HN 8.229  | 20 G HA3 3.899 | 28 S N 115.671                    |
| 3 F HA 4.603   | 11 I N 123.612 | 20 G HN 8.434  | 29 Q CA 53.641                    |
| 3 F HN 8.236   | 12 G CA 45.079 | 20 G N 110.051 | 29 Q CB 28.951                    |
| 3 F N 120.444  | 12 G HA2 3.926 | 21 L CA 55.136 | 29 Q HA 4.653                     |
| 4 S CA 58.068  | 12 G HA3 3.926 | 21 L CB 42.288 | 29 Q HN 8.49                      |
| 4 S CB 63.815  | 12 G HN 8.66   | 21 L HA 4.265  | 29 Q N 122.947                    |
| 4 S HA 4.394   | 12 G N 113.595 | 21 L HN 8.136  | 30 P CA 63.166                    |
| 4 S HN 8.291   | 13 Q CA 53.38  | 21 L N 121.51  | 30 P CB 32.344                    |
| 4 S N 117.862  | 13 Q CB 28.889 | 22 F CA 57.699 | 30 P HA 4.373                     |
| 5 F CA 58.271  | 13 Q HA 4.647  | 22 F CB 39.446 |                                   |
| 5 F CB 39.509  | 13 Q HN 8.278  | 22 F HA 4.608  | <b>Nup98</b> <sup>FG322-351</sup> |
| 5 F HA 4.558   | 13 Q N 120.864 | 22 F HN 8.421  | TQASQPGLF                         |
| 5 F HN 8.37    | 14 P CA 63.274 | 22 F N 120.451 | GTATNTSTGT                        |
| 5 F N 119.239  | 14 P CB 32.261 | 23 G CA 45.31  | AFGTGTGLFG                        |
| 6 G CA 45.301  | 14 P HA 4.466  | 23 G HA2 3.87  |                                   |
| 6 G HA2 3.849  | 15 S CA 58.335 | 23 G HA3 3.919 | 1 T CA 62.211                     |
| 6 G HA3 3.945  | 15 S CB 63.739 | 23 G HN 8.367  | 1 T CB 69.828                     |
| 6 G HN 8.453   | 15 S HA 4.504  | 23 G N 110.597 | 1 T HA 4.283                      |
| 6 G N 110.5    | 15 S HN 8.679  | 24 V CA 62.542 | 1 T HN 8.359                      |
| 7 N CA 53.305  | 15 S N 116.69  | 24 V CB 32.854 | 1 T N 119.794                     |
| 7 N CB 38.93   | 16 T CA 61.889 | 24 V HA 4.189  | 2 Q CA 55.926                     |
| 7 N HA 4.799   | 16 T CB 69.73  | 24 V HN 8.067  | 2 Q CB 29.415                     |
| 7 N HN 8.409   | 16 T HA 4.368  | 24 V N 119.731 | 2 Q HA 4.326                      |
| 7 N N 119.051  | 16 T HN 8.364  | 25 T CA 62.182 | 2 Q HN 8.66                       |
| 8 T CA 61.945  | 16 T N 115.765 | 25 T CB 69.847 | 2 Q N 123.075                     |
| 8 T CB 69.566  | 17 N CA 53.249 | 25 T HA 4.332  | 3 A CA 52.732                     |
| 8 T HA 4.37    | 17 N CB 38.767 | 25 T HN 8.465  | 3 A CB 19.198                     |
| 8 T HN 8.349   | 17 N HA 4.802  | 25 T N 119.289 | 3 A HA 4.305                      |
| 8 T N 114.632  | 17 N HN 8.574  | 26 Q CA 55.769 | 3 A HN 8.522                      |
| 9 S CA 58.518  | 17 N N 121.26  | 26 Q CB 29.591 | 3 A N 125.338                     |
| 9 S CB 63.805  | 18 T CA 62.228 | 26 Q HA 4.317  | 4 S CA 58.376                     |
| 9 S HA 4.524   | 18 T CB 69.512 | 26 Q HN 8.604  | 4 S CB 63.789                     |
| 9 S HN 8.492   | 18 T HA 4.317  | 26 Q N 123.831 | 4 S HA 4.413                      |
| 9 S N 118.335  | 18 T HN 8.34   | 27 A CA 52.622 | 4 S HN 8.395                      |
| 10 T CA 61.946 | 18 T N 114.835 | 27 A CB 19.219 | 4 S N 115.022                     |
| 10 T CB 69.652 | 19 M CA 55.893 | 27 A HA 4.314  | 5 Q CA 53.624                     |
| 10 T HA 4.371  | 19 M CB 32.467 | 27 A HN 8.55   | 5 Q CB 28.983                     |

|                |                |                |                                   |
|----------------|----------------|----------------|-----------------------------------|
| 5 Q HA 4.664   | 14 T CB 69.9   | 22 F HN 8.357  |                                   |
| 5 Q HN 8.433   | 14 T HA 4.316  | 22 F N 119.988 | <b>Nup98</b> <sup>FG345-384</sup> |
| 5 Q N 122.612  | 14 T HN 8.3    | 23 G CA 45.291 | TGTGLFGQTN                        |
| 6 P CA 63.666  | 14 T N 113.323 | 23 G HA2 3.886 | TGFGAVGSTL                        |
| 6 P CB 32.073  | 15 N CA 53.306 | 23 G HA3 3.977 | FGNNKLTTFG                        |
| 6 P HA 4.427   | 15 N CB 38.809 | 23 G HN 8.391  | SSTTSAPSG                         |
| 7 G CA 45.349  | 15 N HA 4.799  | 23 G N 112.173 |                                   |
| 7 G HA2 3.98   | 15 N HN 8.585  | 24 T CA 62.021 | 1 T CA 61.697                     |
| 7 G HA3 3.98   | 15 N N 121.173 | 24 T CB 69.886 | 1 T CB 69.727                     |
| 7 G HN 8.707   | 16 T CA 62.009 | 24 T HA 4.369  | 1 T HA 4.306                      |
| 7 G N 109.768  | 16 T CB 69.74  | 24 T HN 8.235  | 1 T HN 8.416                      |
| 8 G CA 45.289  | 16 T HA 4.382  | 24 T N 112.968 | 1 T N 112.6                       |
| 8 G HA2 3.924  | 16 T HN 8.331  | 25 G CA 45.443 | 2 G CA 45.445                     |
| 8 G HA3 3.924  | 16 T N 114.283 | 25 G HA2 4.025 | 2 G HA2 4.027                     |
| 8 G HN 8.336   | 17 S CA 58.654 | 25 G HA3 4.055 | 2 G HA3 4.027                     |
| 8 G N 108.349  | 17 S CB 63.743 | 25 G HN 8.655  | 2 G HN 8.706                      |
| 9 L CA 55.303  | 17 S HA 4.537  | 25 G N 111.318 | 2 G N 111.817                     |
| 9 L CB 42.31   | 17 S HN 8.529  | 26 T CA 61.991 | 3 T CA 61.866                     |
| 9 L HA 4.254   | 17 S N 118.132 | 26 T CB 69.884 | 3 T CB 69.793                     |
| 9 L HN 8.258   | 18 T CA 62.098 | 26 T HA 4.365  | 3 T HA 4.374                      |
| 9 L N 121.354  | 18 T CB 69.74  | 26 T HN 8.241  | 3 T HN 8.239                      |
| 10 F CA 57.834 | 18 T HA 4.378  | 26 T N 112.729 | 3 T N 113.034                     |
| 10 F CB 39.505 | 18 T HN 8.314  | 27 G CA 45.305 | 4 G CA 45.361                     |
| 10 F HA 4.637  | 18 T N 115.135 | 27 G HA2 3.896 | 4 G HA2 3.921                     |
| 10 F HN 8.429  | 19 G CA 45.423 | 27 G HA3 3.926 | 4 G HA3 3.921                     |
| 10 F N 120.168 | 19 G HA2 4.025 | 27 G HN 8.567  | 4 G HN 8.583                      |
| 11 G CA 45.319 | 19 G HA3 4.025 | 27 G N 110.987 | 4 G N 111.272                     |
| 11 G HA2 3.968 | 19 G HN 8.483  | 28 L CA 55.204 | 5 L CA 55.219                     |
| 11 G HA3 3.968 | 19 G N 111.002 | 28 L CB 42.315 | 5 L CB 42.272                     |
| 11 G HN 8.337  | 20 T CA 61.806 | 28 L HA 4.26   | 5 L HA 4.265                      |
| 11 G N 110.37  | 20 T CB 69.981 | 28 L HN 8.163  | 5 L HN 8.162                      |
| 12 T CA 61.894 | 20 T HA 4.312  | 28 L N 121.396 | 5 L N 121.705                     |
| 12 T CB 70.007 | 20 T HN 8.178  | 29 F CA 57.967 | 6 F CA 58.059                     |
| 12 T HA 4.344  | 20 T N 113.673 | 29 F CB 39.228 | 6 F CB 39.3                       |
| 12 T HN 8.169  | 21 A CA 52.54  | 29 F HA 4.59   | 6 F HA 4.594                      |
| 12 T N 113.589 | 21 A CB 19.095 | 29 F HN 8.523  | 6 F HN 8.44                       |
| 13 A CA 52.723 | 21 A HA 4.285  | 29 F N 120.937 | 6 F N 120.727                     |
| 13 A CB 19.25  | 21 A HN 8.455  | 30 G CA 44.937 | 7 G CA 45.235                     |
| 13 A HA 4.403  | 21 A N 126.24  | 30 G HA2 3.76  | 7 G HA2 3.822                     |
| 13 A HN 8.54   | 22 F CA 58.08  | 30 G HA3 3.846 | 7 G HA3 3.905                     |
| 13 A N 126.495 | 22 F CB 39.623 | 30 G HN 8.394  | 7 G HN 8.395                      |
| 14 T CA 61.912 | 22 F HA 4.582  | 30 G N 110.736 | 7 G N 110.747                     |

|                |                |                |                                 |
|----------------|----------------|----------------|---------------------------------|
| 8 Q CA 55.797  | 16 V HA 4.053  | 24 N N 119.393 | 33 T CB 69.635                  |
| 8 Q CB 29.541  | 16 V HN 8.362  | 25 K CA 56.558 | 33 T HA 4.449                   |
| 8 Q HA 4.404   | 16 V N 120.395 | 25 K CB 32.823 | 33 T HN 8.393                   |
| 8 Q HN 8.278   | 17 G CA 45.33  | 25 K HA 4.276  | 33 T N 116.036                  |
| 8 Q N 119.926  | 17 G HA2 3.956 | 25 K HN 8.353  | 34 T CA 61.856                  |
| 9 T CA 62.018  | 17 G HA3 4.003 | 25 K N 121.427 | 34 T CB 69.768                  |
| 9 T CB 69.756  | 17 G HN 8.65   | 26 L CA 55.271 | 34 T HA 4.395                   |
| 9 T HA 4.354   | 17 G N 113.17  | 26 L CB 42.334 | 34 T HN 8.265                   |
| 9 T HN 8.406   | 18 S CA 58.462 | 26 L HA 4.419  | 34 T N 116.425                  |
| 9 T N 115.547  | 18 S CB 63.915 | 26 L HN 8.335  | 35 S CA 58.215                  |
| 10 N CA 53.291 | 18 S HA 4.486  | 26 L N 122.84  | 35 S CB 63.922                  |
| 10 N CB 38.773 | 18 S HN 8.307  | 27 T CA 61.941 | 35 S HA 4.452                   |
| 10 N HA 4.799  | 18 S N 115.813 | 27 T CB 69.786 | 35 S HN 8.403                   |
| 10 N HN 8.671  | 19 T CA 62.116 | 27 T HA 4.372  | 35 S N 118.851                  |
| 10 N N 121.472 | 19 T CB 69.724 | 27 T HN 8.261  | 36 A CA 50.67                   |
| 11 T CA 62.044 | 19 T HA 4.337  | 27 T N 115.228 | 36 A CB 19.292                  |
| 11 T CB 69.722 | 19 T HN 8.368  | 28 T CA 62.321 | 36 A HA 4.591                   |
| 11 T HA 4.3    | 19 T N 116.423 | 28 T CB 69.78  | 36 A HN 8.444                   |
| 11 T HN 8.282  | 20 L CA 55.31  | 28 T HA 4.306  | 36 A N 127.553                  |
| 11 T N 114.007 | 20 L CB 42.225 | 28 T HN 8.136  | 37 P CA 63.111                  |
| 12 G CA 45.29  | 20 L HA 4.272  | 28 T N 116.314 | 37 P CB 32.108                  |
| 12 G HA2 3.84  | 20 L HN 8.233  | 29 F CA 58.096 | 37 P HA 4.403                   |
| 12 G HA3 3.918 | 20 L N 124.146 | 29 F CB 39.641 | 38 S CA 58.212                  |
| 12 G HN 8.452  | 21 F CA 58.142 | 29 F HA 4.618  | 38 S CB 63.811                  |
| 12 G N 110.892 | 21 F CB 39.589 | 29 F HN 8.433  | 38 S HA 4.376                   |
| 13 F CA 58.099 | 21 F HA 4.618  | 29 F N 123.032 | 38 S HN 8.499                   |
| 13 F CB 39.573 | 21 F HN 8.281  | 30 G CA 45.268 | 38 S N 116.329                  |
| 13 F HA 4.593  | 21 F N 120.491 | 30 G HA2 3.858 | 39 F CA 57.804                  |
| 13 F HN 8.284  | 22 G CA 45.301 | 30 G HA3 3.962 | 39 F CB 39.574                  |
| 13 F N 120.453 | 22 G HA2 3.844 | 30 G HN 8.47   | 39 F HA 4.614                   |
| 14 G CA 45.204 | 22 G HA3 3.914 | 30 G N 111.523 | 39 F HN 8.475                   |
| 14 G HA2 3.813 | 22 G HN 8.377  | 31 S CA 58.351 | 39 F N 122.728                  |
| 14 G HA3 3.878 | 22 G N 110.454 | 31 S CB 63.97  | 40 G CA 44.937                  |
| 14 G HN 8.495  | 23 N CA 53.236 | 31 S HA 4.511  | 40 G HA2 3.771                  |
| 14 G N 111.149 | 23 N CB 38.773 | 31 S HN 8.315  | 40 G HA3 3.842                  |
| 15 A CA 52.369 | 23 N HA 4.693  | 31 S N 115.874 | 40 G HN 8.477                   |
| 15 A CB 18.115 | 23 N HN 8.412  | 32 S CA 58.538 | 40 G N 112.584                  |
| 15 A HA 4.336  | 23 N N 119.779 | 32 S CB 63.815 |                                 |
| 15 A HN 8.194  | 24 N CA 53.502 | 32 S HA 4.568  |                                 |
| 15 A N 124.039 | 24 N CB 38.72  | 32 S HN 8.612  | <b>Nup98</b> <sup>FG1-384</sup> |
| 16 V CA 62.848 | 24 N HA 4.658  | 32 S N 118.147 | MFNKSFGTPF                      |
| 16 V CB 32.608 | 24 N HN 8.516  | 33 T CA 62.034 | GGGTGGFGTT                      |

|               |                |                |                |
|---------------|----------------|----------------|----------------|
| STFGQNTGFG    | 2 F CB 39.642  | 11 G CA 45.303 | 19 T HA 4.463  |
| TTSGGAFGTS    | 2 F HA 4.637   | 11 G HA2 3.823 | 19 T HN 8.189  |
| AFGSSNNTGG    | 2 F HN 8.284   | 11 G HA3 3.874 | 19 T N 113.534 |
| LFGNSQTKPG    | 2 F N 121.816  | 11 G HN 8.417  | 20 T CA 61.887 |
| GLFGTSSFSQ    | 3 N CA 52.915  | 11 G N 112     | 20 T CB 69.848 |
| PATSTSTGFG    | 3 N CB 39.061  | 12 G CA 45.286 | 20 T HA 4.414  |
| FGTSTGTANT    | 3 N HA 4.603   | 12 G HA2 3.925 | 20 T HN 8.355  |
| LFGTASTGTS    | 3 N HN 8.528   | 12 G HA3 3.925 | 20 T N 116.345 |
| LFSSQNNFAA    | 3 N N 122.099  | 12 G HN 8.01   | 21 S CA 58.396 |
| QNKPTGFGNF    | 4 K CA 56.784  | 12 G N 108.431 | 21 S CB 63.882 |
| GTSTSSGGLF    | 4 K CB 42.058  | 13 G CA 45.211 | 21 S HA 4.513  |
| GTTNTTSNPF    | 4 K HA 4.192   | 13 G HA2 4.035 | 21 S HN 8.501  |
| GSTSGSLFGP    | 4 K HN 8.419   | 13 G HA3 4.035 | 21 S N 118.596 |
| SSFTAAPTGT    | 4 K N 122.541  | 13 G HN 8.411  | 22 T CA 61.956 |
| TIKFNPTGT     | 5 S CA 58.398  | 13 G N 108.93  | 22 T CB 69.632 |
| DTMVKAGVST    | 5 S CB 63.693  | 14 T CA 62.039 | 22 T HA 4.306  |
| NISTKHQCIT    | 5 S HA 4.391   | 14 T CB 69.795 | 22 T HN 8.278  |
| AMKEYESKSL    | 5 S HN 8.378   | 14 T HA 4.376  | 22 T N 115.958 |
| EELRLEDYQA    | 5 S N 116.589  | 14 T HN 8.328  | 23 F CA 58.167 |
| NRKGPQNQVG    | 6 F CA 58.058  | 14 T N 113.057 | 23 F CB 39.509 |
| AGTTTGLFGS    | 6 F CB 39.648  | 15 G CA 45.286 | 23 F HA 4.565  |
| SPATSSATGL    | 6 F HA 4.615   | 15 G HA2 3.933 | 23 F HN 8.333  |
| FSSSTTNSGF    | 6 F HN 8.327   | 15 G HA3 3.933 | 23 F N 122.83  |
| AYGQNKTAFG    | 6 F N 122.114  | 15 G HN 8.612  | 24 G CA 45.278 |
| TSTTGFGTNP    | 7 G CA 45.036  | 15 G N 111.485 | 24 G HA2 3.755 |
| GGLFGQQNQQ    | 7 G HA2 3.893  | 16 G CA 45.026 | 24 G HA3 3.887 |
| TTSLFSKPG     | 7 G HA3 3.947  | 16 G HA2 3.858 | 24 G HN 8.426  |
| QATTTQNTGF    | 7 G HN 8.416   | 16 G HA3 3.858 | 24 G N 111.484 |
| SFGNTSTIGQ    | 7 G N 110.356  | 16 G HN 8.263  | 25 Q CA 55.852 |
| PSTNTMGLFG    | 8 T CA 59.827  | 16 G N 108.624 | 25 Q CB 29.47  |
| VTQASQPGGL    | 8 T CB 69.759  | 17 F CA 58.16  | 25 Q HA 4.303  |
| FGTATNTSTG    | 8 T HA 4.613   | 17 F CB 39.504 | 25 Q HN 8.244  |
| TAFGTGTGLF    | 8 T HN 8.183   | 17 F HA 4.599  | 25 Q N 119.725 |
| GQNTGFGAV     | 8 T N 116.035  | 17 F HN 8.327  | 26 N CA 53.317 |
| GSTLFGNNKL    | 9 P CA 63.355  | 17 F N 120.275 | 26 N CB 38.68  |
| TTFGSSTTSA    | 9 P CB 32.043  | 18 G CA 45.336 | 26 N HA 4.77   |
| PSEF          | 9 P HA 4.377   | 18 G HA2 3.887 | 26 N HN 8.71   |
|               | 10 F CA 58.333 | 18 G HA3 3.975 | 26 N N 120.15  |
| 1 M CA 55.148 | 10 F CB 39.34  | 18 G HN 8.534  | 27 T CA 62.095 |
| 1 M CB 33.364 | 10 F HA 4.573  | 18 G N 111.129 | 27 T CB 69.728 |
| 1 M HA 3.97   | 10 F HN 8.497  | 19 T CA 61.844 | 27 T HA 4.301  |
| 2 F CA 57.943 | 10 F N 120.952 | 19 T CB 70.016 | 27 T HN 8.255  |

|                |                |                |                |
|----------------|----------------|----------------|----------------|
| 27 T N 114.055 | 36 A CB 19.138 | 44 S HN 8.277  | 53 G CA 45.396 |
| 28 G CA 45.303 | 36 A HA 4.245  | 44 S N 115.805 | 53 G HA2 3.856 |
| 28 G HA2 3.825 | 36 A HN 8.301  | 45 S CA 58.597 | 53 G HA3 3.907 |
| 28 G HA3 3.908 | 36 A N 123.879 | 45 S CB 63.727 | 53 G HN 8.32   |
| 28 G HN 8.46   | 37 F CA 58.005 | 45 S HA 4.453  | 53 G N 110.278 |
| 28 G N 110.789 | 37 F CB 39.514 | 45 S HN 8.544  | 54 N CA 53.22  |
| 29 F CA 58.039 | 37 F HA 4.554  | 45 S N 117.844 | 54 N CB 39.005 |
| 29 F CB 39.529 | 37 F HN 8.411  | 46 N CA 53.312 | 54 N HA 4.759  |
| 29 F HA 4.602  | 37 F N 119.678 | 46 N CB 38.711 | 54 N HN 8.422  |
| 29 F HN 8.266  | 38 G CA 45.328 | 46 N HA 4.701  | 54 N N 118.978 |
| 29 F N 120.414 | 38 G HA2 3.875 | 46 N HN 8.511  | 55 S CA 58.815 |
| 30 G CA 45.336 | 38 G HA3 3.972 | 46 N N 120.494 | 55 S CB 63.648 |
| 30 G HA2 3.887 | 38 G HN 8.325  | 47 N CA 53.304 | 55 S HA 4.407  |
| 30 G HA3 3.975 | 38 G N 111.017 | 47 N CB 38.695 | 55 S HN 8.48   |
| 30 G HN 8.534  | 39 T CA 61.792 | 47 N HA 4.767  | 55 S N 116.438 |
| 30 G N 111.129 | 39 T CB 70.016 | 47 N HN 8.491  | 56 Q CA 55.97  |
| 31 T CA 61.844 | 39 T HA 4.414  | 47 N N 119.483 | 56 Q CB 29.446 |
| 31 T CB 70.016 | 39 T HN 8.144  | 48 T CA 62.232 | 56 Q HA 4.392  |
| 31 T HA 4.463  | 39 T N 113.318 | 48 T CB 69.645 | 56 Q HN 8.556  |
| 31 T HN 8.189  | 40 S CA 58.462 | 48 T HA 4.333  | 56 Q N 121.965 |
| 31 T N 113.534 | 40 S CB 63.815 | 48 T HN 8.291  | 57 T CA 62.131 |
| 32 T CA 61.904 | 40 S HA 4.424  | 48 T N 113.926 | 57 T CB 69.781 |
| 32 T CB 70.016 | 40 S HN 8.506  | 49 G CA 45.38  | 57 T HA 4.278  |
| 32 T HA 4.452  | 40 S N 118.367 | 49 G HA2 3.975 | 57 T HN 8.254  |
| 32 T HN 8.397  | 41 A CA 52.633 | 49 G HA3 3.975 | 57 T N 115.915 |
| 32 T N 116.026 | 41 A CB 19.031 | 49 G HN 8.574  | 58 K CA 54.241 |
| 33 S CA 58.614 | 41 A HA 4.233  | 49 G N 111.331 | 58 K CB 32.533 |
| 33 S CB 63.842 | 41 A HN 8.422  | 50 G CA 45.199 | 58 K HA 4.61   |
| 33 S HA 4.478  | 41 A N 126.071 | 50 G HA2 3.886 | 58 K HN 8.471  |
| 33 S HN 8.492  | 42 F CA 58.12  | 50 G HA3 3.886 | 58 K N 125.719 |
| 33 S N 118.264 | 42 F CB 39.432 | 50 G HN 8.318  | 59 P CA 63.493 |
| 34 G CA 45.359 | 42 F HA 4.545  | 50 G N 108.822 | 59 P CB 32.136 |
| 34 G HA2 3.977 | 42 F HN 8.279  | 51 L CA 55.343 | 59 P HA 4.415  |
| 34 G HA3 3.977 | 42 F N 119.617 | 51 L CB 42.226 | 60 G CA 45.456 |
| 34 G HN 8.544  | 43 G CA 45.289 | 51 L HA 4.221  | 60 G HA2 3.959 |
| 34 G N 111.145 | 43 G HA2 3.829 | 51 L HN 8.199  | 60 G HA3 3.987 |
| 35 G CA 45.085 | 43 G HA3 3.944 | 51 L N 121.736 | 60 G HN 8.673  |
| 35 G HA2 3.901 | 43 G HN 8.349  | 52 F CA 57.733 | 60 G N 110.149 |
| 35 G HA3 3.901 | 43 G N 111.204 | 52 F CB 39.394 | 61 G CA 45.393 |
| 35 G HN 8.293  | 44 S CA 58.449 | 52 F HA 4.615  | 61 G HA2 3.894 |
| 35 G N 108.828 | 44 S CB 63.936 | 52 F HN 8.409  | 61 G HA3 3.939 |
| 36 A CA 52.479 | 44 S HA 4.473  | 52 F N 120.087 | 61 G HN 8.344  |

|                |                |                |                |
|----------------|----------------|----------------|----------------|
| 61 G N 108.732 | 70 Q CB 28.972 | 79 F CA 58.19  | 87 T HA 4.334  |
| 62 L CA 55.267 | 70 Q HA 4.568  | 79 F CB 39.551 | 87 T HN 8.192  |
| 62 L CB 42.314 | 70 Q HN 8.417  | 79 F HA 4.561  | 87 T N 114.013 |
| 62 L HA 4.265  | 70 Q N 123.474 | 79 F HN 8.292  | 88 A CA 52.815 |
| 62 L HN 8.287  | 71 P CA 63.058 | 79 F N 120.415 | 88 A CB 19.172 |
| 62 L N 121.693 | 71 P CB 32.207 | 80 G CA 45.057 | 88 A HA 4.301  |
| 63 F CA 57.939 | 71 P HA 4.402  | 80 G HA2 3.714 | 88 A HN 8.511  |
| 63 F CB 39.492 | 72 A CA 52.615 | 80 G HA3 3.852 | 88 A N 126.603 |
| 63 F HA 4.567  | 72 A CB 19.161 | 80 G HN 8.435  | 89 N CA 53.345 |
| 63 F HN 8.443  | 72 A HA 4.35   | 80 G N 111.001 | 89 N CB 38.768 |
| 63 F N 120.715 | 72 A HN 8.667  | 81 F CA 58.1   | 89 N HA 4.712  |
| 64 G CA 45.456 | 72 A N 125.037 | 81 F CB 39.557 | 89 N HN 8.532  |
| 64 G HA2 3.889 | 73 T CA 61.675 | 81 F HA 4.607  | 89 N N 118.253 |
| 64 G HA3 3.978 | 73 T CB 70.034 | 81 F HN 8.232  | 90 T CA 62.097 |
| 64 G HN 8.313  | 73 T HA 4.372  | 81 F N 120.417 | 90 T CB 69.807 |
| 64 G N 110.858 | 73 T HN 8.294  | 82 G CA 45.365 | 90 T HA 4.27   |
| 65 T CA 61.841 | 73 T N 113.448 | 82 G HA2 3.9   | 90 T HN 8.177  |
| 65 T CB 70.061 | 74 S CA 58.368 | 82 G HA3 3.996 | 90 T N 114.057 |
| 65 T HA 4.414  | 74 S CB 63.823 | 82 G HN 8.565  | 91 L CA 55.344 |
| 65 T HN 8.178  | 74 S HA 4.53   | 82 G N 111.241 | 91 L CB 42.161 |
| 65 T N 113.337 | 74 S HN 8.499  | 83 T CA 61.836 | 91 L HA 4.283  |
| 66 S CA 58.564 | 74 S N 118.151 | 83 T CB 69.844 | 91 L HN 8.278  |
| 66 S CB 63.825 | 75 T CA 61.913 | 83 T HA 4.42   | 91 L N 124.2   |
| 66 S HA 4.497  | 75 T CB 69.786 | 83 T HN 8.172  | 92 F CA 57.956 |
| 66 S HN 8.56   | 75 T HA 4.41   | 83 T N 113.524 | 92 F CB 39.558 |
| 66 S N 118.242 | 75 T HN 8.362  | 84 S CA 58.415 | 92 F HA 4.617  |
| 67 S CA 58.877 | 75 T N 115.779 | 84 S CB 63.687 | 92 F HN 8.3    |
| 67 S CB 63.699 | 76 S CA 58.472 | 84 S HA 4.56   | 92 F N 120.864 |
| 67 S HA 4.414  | 76 S CB 63.745 | 84 S HN 8.593  | 93 G CA 45.352 |
| 67 S HN 8.413  | 76 S HA 4.498  | 84 S N 118.47  | 93 G HA2 3.899 |
| 67 S N 117.908 | 76 S HN 8.446  | 85 T CA 62.108 | 93 G HA3 3.975 |
| 68 F CA 57.856 | 76 S N 118.424 | 85 T CB 69.844 | 93 G HN 8.368  |
| 68 F CB 39.62  | 77 T CA 62.041 | 85 T HA 4.375  | 93 G N 110.846 |
| 68 F HA 4.636  | 77 T CB 69.854 | 85 T HN 8.356  | 94 T CA 61.898 |
| 68 F HN 8.262  | 77 T HA 4.33   | 85 T N 115.665 | 94 T CB 69.95  |
| 68 F N 122.216 | 77 T HN 8.275  | 86 G CA 45.391 | 94 T HA 4.336  |
| 69 S CA 58.008 | 77 T N 115.545 | 86 G HA2 4.012 | 94 T HN 8.174  |
| 69 S CB 63.863 | 78 G CA 45.052 | 86 G HA3 4.012 | 94 T N 114.755 |
| 69 S HA 4.394  | 78 G HA2 3.841 | 86 G HN 8.486  | 95 A CA 52.619 |
| 69 S HN 8.211  | 78 G HA3 3.938 | 86 G N 111.324 | 95 A CB 19.204 |
| 69 S N 118.103 | 78 G HN 8.396  | 87 T CA 61.932 | 95 A HA 4.369  |
| 70 Q CA 53.667 | 78 G N 110.885 | 87 T CB 69.927 | 95 A HN 8.537  |



|                 |                 |                 |                 |
|-----------------|-----------------|-----------------|-----------------|
| 95 A N 126.78   | 104 S CB 63.631 | 112 N HN 8.492  | 121 G HA3 3.99  |
| 96 S CA 58.439  | 104 S HA 4.417  | 112 N N 119.672 | 121 G HN 8.46   |
| 96 S CB 63.773  | 104 S HN 8.494  | 113 K CA 54.251 | 121 G N 110.566 |
| 96 S HA 4.5     | 104 S N 118.378 | 113 K CB 32.498 | 122 T CA 61.768 |
| 96 S HN 8.495   | 105 Q CA 56.203 | 113 K HA 4.576  | 122 T CB 69.981 |
| 96 S N 115.679  | 105 Q CB 29.275 | 113 K HN 8.351  | 122 T HA 4.424  |
| 97 T CA 62.017  | 105 Q HA 4.306  | 113 K N 122.84  | 122 T HN 8.179  |
| 97 T CB 69.775  | 105 Q HN 8.425  | 114 P CA 63.124 | 122 T N 113.405 |
| 97 T HA 4.389   | 105 Q N 121.699 | 114 P CB 32.164 | 123 S CA 58.577 |
| 97 T HN 8.346   | 106 N CA 53.322 | 114 P HA 4.487  | 123 S CB 63.873 |
| 97 T N 115.646  | 106 N CB 38.742 | 115 T CA 62.171 | 123 S HA 4.564  |
| 98 G CA 45.447  | 106 N HA 4.664  | 115 T CB 69.908 | 123 S HN 8.563  |
| 98 G HA2 4.039  | 106 N HN 8.431  | 115 T HA 4.281  | 123 S N 118.356 |
| 98 G HA3 4.039  | 106 N N 119.555 | 115 T HN 8.448  | 124 T CA 61.918 |
| 98 G HN 8.555   | 107 N CA 53.372 | 115 T N 114.782 | 124 T CB 69.75  |
| 98 G N 111.257  | 107 N CB 38.774 | 116 G CA 45.111 | 124 T HA 4.422  |
| 99 T CA 61.935  | 107 N HA 4.654  | 116 G HA2 3.854 | 124 T HN 8.385  |
| 99 T CB 69.879  | 107 N HN 8.44   | 116 G HA3 3.947 | 124 T N 115.744 |
| 99 T HA 4.377   | 107 N N 119.728 | 116 G HN 8.465  | 125 S CA 58.497 |
| 99 T HN 8.229   | 108 A CA 53.181 | 116 G N 111.133 | 125 S CB 63.827 |
| 99 T N 113.941  | 108 A CB 18.839 | 117 F CA 58.048 | 125 S HA 4.506  |
| 100 S CA 58.45  | 108 A HA 4.181  | 117 F CB 39.505 | 125 S HN 8.439  |
| 100 S CB 63.749 | 108 A HN 8.314  | 117 F HA 4.607  | 125 S N 118.168 |
| 100 S HA 4.452  | 108 A N 124.125 | 117 F HN 8.303  | 126 S CA 58.668 |
| 100 S HN 8.523  | 109 F CA 57.731 | 117 F N 120.27  | 126 S CB 63.822 |
| 100 S N 118.78  | 109 F CB 39.218 | 118 G CA 45.205 | 126 S HA 4.481  |
| 101 L CA 55.562 | 109 F HA 4.572  | 118 G HA2 3.729 | 126 S HN 8.505  |
| 101 L CB 42.142 | 109 F HN 8.167  | 118 G HA3 3.851 | 126 S N 118.115 |
| 101 L HA 4.274  | 109 F N 118.624 | 118 G HN 8.458  | 127 G CA 45.407 |
| 101 L HN 8.417  | 110 A CA 52.644 | 118 G N 111.023 | 127 G HA2 3.98  |
| 101 L N 124.461 | 110 A CB 19.173 | 119 N CA 53.033 | 127 G HA3 3.98  |
| 102 F CA 57.974 | 110 A HA 4.245  | 119 N CB 38.72  | 127 G HN 8.515  |
| 102 F CB 39.669 | 110 A HN 8.104  | 119 N HA 4.675  | 127 G N 110.987 |
| 102 F HA 4.621  | 110 A N 124.857 | 119 N HN 8.267  | 128 G CA 45.175 |
| 102 F HN 8.303  | 111 Q CA 55.866 | 119 N N 118.797 | 128 G HA2 3.906 |
| 102 F N 120.449 | 111 Q CB 29.354 | 120 F CA 58.033 | 128 G HA3 3.906 |
| 103 S CA 58.344 | 111 Q HA 4.266  | 120 F CB 39.374 | 128 G HN 8.299  |
| 103 S CB 63.819 | 111 Q HN 8.351  | 120 F HA 4.635  | 128 G N 108.726 |
| 103 S HA 4.435  | 111 Q N 119.131 | 120 F HN 8.432  | 129 L CA 55.275 |
| 103 S HN 8.251  | 112 N CA 52.965 | 120 F N 120.971 | 129 L CB 42.292 |
| 103 S N 117.345 | 112 N CB 38.794 | 121 G CA 45.368 | 129 L HA 4.256  |
| 104 S CA 58.883 | 112 N HA 4.669  | 121 G HA2 3.928 | 129 L HN 8.213  |

|                 |                 |                 |                 |
|-----------------|-----------------|-----------------|-----------------|
| 129 L N 121.712 | 138 N HA 4.971  | 147 L CB 42.166 | 156 A CA 50.481 |
| 130 F CA 57.921 | 138 N HN 8.528  | 147 L HA 4.262  | 156 A CB 17.929 |
| 130 F CB 39.462 | 138 N N 121.452 | 147 L HN 8.37   | 156 A HA 4.546  |
| 130 F HA 4.626  | 139 P CA 63.682 | 147 L N 123.868 | 156 A HN 8.44   |
| 130 F HN 8.432  | 139 P CB 31.901 | 148 F CA 57.377 | 156 A N 125.13  |
| 130 F N 120.593 | 139 P HA 4.334  | 148 F CB 39.886 | 157 P CA 63.064 |
| 131 G CA 45.368 | 140 F CA 57.87  | 148 F HA 4.697  | 157 P CB 32.108 |
| 131 G HA2 3.929 | 140 F CB 39.02  | 148 F HN 8.237  | 157 P HA 4.497  |
| 131 G HA3 3.976 | 140 F HA 4.634  | 148 F N 119.508 | 158 T CA 62.047 |
| 131 G HN 8.336  | 140 F HN 8.334  | 149 G CA 44.646 | 158 T CB 69.962 |
| 131 G N 110.636 | 140 F N 119.545 | 149 G HA2 4.059 | 158 T HA 4.341  |
| 132 T CA 61.807 | 141 G CA 45.383 | 149 G HA3 4.093 | 158 T HN 8.456  |
| 132 T CB 70.018 | 141 G HA2 3.898 | 149 G HN 8.228  | 158 T N 114.504 |
| 132 T HA 4.457  | 141 G HA3 3.969 | 149 G N 110.081 | 159 G CA 45.337 |
| 132 T HN 8.185  | 141 G HN 8.16   | 150 P CA 63.501 | 159 G HA2 4.037 |
| 132 T N 113.41  | 141 G N 110.079 | 150 P CB 32.168 | 159 G HA3 4.037 |
| 133 T CA 61.952 | 142 S CA 58.408 | 150 P HA 4.427  | 159 G HN 8.592  |
| 133 T CB 69.866 | 142 S CB 63.958 | 151 S CA 58.515 | 159 G N 111.172 |
| 133 T HA 4.39   | 142 S HA 4.547  | 151 S CB 63.765 | 160 T CA 61.932 |
| 133 T HN 8.352  | 142 S HN 8.343  | 151 S HA 4.467  | 160 T CB 69.786 |
| 133 T N 116.282 | 142 S N 115.401 | 151 S HN 8.613  | 160 T HA 4.423  |
| 134 N CA 53.346 | 143 T CA 61.837 | 151 S N 115.643 | 160 T HN 8.239  |
| 134 N CB 38.873 | 143 T CB 69.742 | 152 S CA 58.568 | 160 T N 113.872 |
| 134 N HA 4.806  | 143 T HA 4.453  | 152 S CB 63.825 | 161 T CA 62.138 |
| 134 N HN 8.644  | 143 T HN 8.459  | 152 S HA 4.403  | 161 T CB 69.848 |
| 134 N N 121.778 | 143 T N 117.826 | 152 S HN 8.341  | 161 T HA 4.348  |
| 135 T CA 61.869 | 144 S CA 58.808 | 152 S N 117.49  | 161 T HN 8.389  |
| 135 T CB 69.738 | 144 S CB 63.738 | 153 F CA 57.851 | 161 T N 117.666 |
| 135 T HA 4.426  | 144 S HA 4.448  | 153 F CB 39.742 | 162 I CA 61.104 |
| 135 T HN 8.349  | 144 S HN 8.46   | 153 F HA 4.685  | 162 I CB 38.562 |
| 135 T N 114.773 | 144 S N 115.486 | 153 F HN 8.284  | 162 I HA 4.1    |
| 136 T CA 62.082 | 145 G CA 45.35  | 153 F N 121.853 | 162 I HN 8.365  |
| 136 T CB 69.816 | 145 G HA2 3.982 | 154 T CA 61.627 | 162 I N 124.575 |
| 136 T HA 4.379  | 145 G HA3 3.982 | 154 T CB 70.004 | 163 K CA 55.966 |
| 136 T HN 8.312  | 145 G HN 8.548  | 154 T HA 4.242  | 163 K CB 33.244 |
| 136 T N 116.228 | 145 G N 110.973 | 154 T HN 8.124  | 163 K HA 4.285  |
| 137 S CA 58.428 | 146 S CA 58.368 | 154 T N 117.146 | 163 K HN 8.482  |
| 137 S CB 63.739 | 146 S CB 63.842 | 155 A CA 52.14  | 163 K N 126.4   |
| 137 S HA 4.428  | 146 S HA 4.415  | 155 A CB 19.317 | 164 F CA 57.419 |
| 137 S HN 8.409  | 146 S HN 8.262  | 155 A HA 4.25   | 164 F CB 39.921 |
| 137 S N 118.239 | 146 S N 115.374 | 155 A HN 8.372  | 164 F HA 4.615  |
| 138 N CB 38.884 | 147 L CA 55.446 | 155 A N 127.251 | 164 F HN 8.461  |

|                 |                 |                 |                 |
|-----------------|-----------------|-----------------|-----------------|
| 164 F N 122.747 | 174 V CB 32.635 | 182 I HN 8.29   | 191 A CA 52.691 |
| 165 N CB 39.034 | 174 V HA 4.042  | 182 I N 121.675 | 191 A CB 19.147 |
| 165 N HA 4.948  | 174 V HN 8.262  | 183 S CA 58.49  | 191 A HA 4.321  |
| 165 N HN 8.53   | 174 V N 120.494 | 183 S CB 63.753 | 191 A HN 8.418  |
| 165 N N 123.627 | 175 K CA 56.116 | 183 S HA 4.529  | 191 A N 126.824 |
| 166 P CA 61.488 | 175 K CB 33.119 | 183 S HN 8.593  | 192 M CA 55.776 |
| 166 P CB 30.894 | 175 K HA 4.312  | 183 S N 120.226 | 192 M CB 32.824 |
| 166 P HA 4.544  | 175 K HN 8.557  | 184 T CA 62.098 | 192 M HA 4.425  |
| 167 P CA 63.047 | 175 K N 126.5   | 184 T CB 69.684 | 192 M HN 8.406  |
| 167 P CB 32.093 | 176 A CA 52.666 | 184 T HA 4.322  | 192 M N 120.194 |
| 167 P HA 4.5    | 176 A CB 19.208 | 184 T HN 8.351  | 193 K CA 56.585 |
| 168 T CA 62.101 | 176 A HA 4.292  | 184 T N 116.733 | 193 K CB 32.939 |
| 168 T CB 70.027 | 176 A HN 8.526  | 185 K CA 55.921 | 193 K HA 4.25   |
| 168 T HA 4.358  | 176 A N 126.354 | 185 K CB 32.899 | 193 K HN 8.47   |
| 168 T HN 8.48   | 177 G CA 45.181 | 185 K HA 4.264  | 193 K N 123.149 |
| 168 T N 114.75  | 177 G HA2 3.953 | 185 K HN 8.336  | 194 E CA 57.065 |
| 169 G CA 45.398 | 177 G HA3 4.001 | 185 K N 123.575 | 194 E CB 30.106 |
| 169 G HA2 4.062 | 177 G HN 8.538  | 186 H CA 55.612 | 194 E HA 4.2    |
| 169 G HA3 4.062 | 177 G N 108.833 | 186 H CB 29.378 | 194 E HN 8.574  |
| 169 G HN 8.614  | 178 V CA 62.243 | 186 H HA 4.661  | 194 E N 124.499 |
| 169 G N 111.492 | 178 V CB 32.92  | 186 H HN 8.625  | 195 Y CA 58.38  |
| 170 T CA 61.885 | 178 V HA 4.191  | 186 H N 120.294 | 195 Y CB 38.737 |
| 170 T CB 69.651 | 178 V HN 8.127  | 187 Q CA 55.929 | 195 Y HA 4.506  |
| 170 T HA 4.361  | 178 V N 119.671 | 187 Q CB 29.649 | 195 Y HN 8.263  |
| 170 T HN 8.277  | 179 S CA 58.335 | 187 Q HA 4.334  | 195 Y N 122.832 |
| 170 T N 113.71  | 179 S CB 63.62  | 187 Q HN 8.594  | 196 E CA 56.646 |
| 171 D CA 54.586 | 179 S HA 4.563  | 187 Q N 122.562 | 196 E CB 30.492 |
| 171 D CB 40.986 | 179 S HN 8.676  | 188 C CA 58.641 | 196 E HA 4.248  |
| 171 D HA 4.678  | 179 S N 120.24  | 188 C CB 27.892 | 196 E HN 8.302  |
| 171 D HN 8.6    | 180 T CA 61.963 | 188 C HA 4.52   | 196 E N 122.819 |
| 171 D N 122.964 | 180 T CB 69.733 | 188 C HN 8.684  | 197 S CA 58.823 |
| 172 T CA 62.305 | 180 T HA 4.36   | 188 C N 122.012 | 197 S CB 63.761 |
| 172 T CB 69.542 | 180 T HN 8.384  | 189 I CA 61.67  | 197 S HA 4.382  |
| 172 T HA 4.284  | 180 T N 116.293 | 189 I CB 38.633 | 197 S HN 8.431  |
| 172 T HN 8.218  | 181 N CA 53.364 | 189 I HA 4.244  | 197 S N 117.409 |
| 172 T N 114.606 | 181 N CB 38.76  | 189 I HN 8.574  | 198 K CA 56.634 |
| 173 M CA 55.765 | 181 N HA 4.743  | 189 I N 122.123 | 198 K CB 33.175 |
| 173 M CB 32.646 | 181 N HN 8.559  | 190 T CA 62.248 | 198 K HA 4.364  |
| 173 M HA 4.475  | 181 N N 121.577 | 190 T CB 69.684 | 198 K HN 8.456  |
| 173 M HN 8.43   | 182 I CA 61.369 | 190 T HA 4.271  | 198 K N 123.725 |
| 173 M N 122.962 | 182 I CB 38.678 | 190 T HN 8.321  | 199 S CA 58.605 |
| 174 V CA 62.669 | 182 I HA 4.211  | 190 T N 119.07  | 199 S CB 63.882 |

|                 |                 |                 |                 |
|-----------------|-----------------|-----------------|-----------------|
| 199 S HA 4.397  | 207 D N 120.394 | 216 Q HN 8.773  | 225 T CA 62.108 |
| 199 S HN 8.536  | 208 Y CA 59.677 | 216 Q N 120.764 | 225 T CB 69.868 |
| 199 S N 117.303 | 208 Y CB 38.32  | 217 N CA 53.384 | 225 T HA 4.361  |
| 200 L CA 56.992 | 208 Y HA 4.388  | 217 N CB 38.819 | 225 T HN 8.287  |
| 200 L CB 41.796 | 208 Y HN 8.181  | 217 N HA 4.669  | 225 T N 116.318 |
| 200 L HA 4.193  | 208 Y N 120.768 | 217 N HN 8.541  | 226 G CA 45.307 |
| 200 L HN 8.555  | 209 Q CA 56.664 | 217 N N 119.658 | 226 G HA2 3.927 |
| 200 L N 122.592 | 209 Q CB 28.997 | 218 Q CA 55.808 | 226 G HA3 3.927 |
| 201 E CA 58.259 | 209 Q HA 4.097  | 218 Q CB 29.514 | 226 G HN 8.486  |
| 201 E CB 29.806 | 209 Q HN 8.257  | 218 Q HA 4.361  | 226 G N 111.344 |
| 201 E HA 4.14   | 209 Q N 119.957 | 218 Q HN 8.478  | 227 L CA 55.21  |
| 201 E HN 8.452  | 210 A CA 53.565 | 218 Q N 120.94  | 227 L CB 42.356 |
| 201 E N 119.631 | 210 A CB 18.833 | 219 V CA 62.79  | 227 L HA 4.272  |
| 202 E CA 58.13  | 210 A HA 4.161  | 219 V CB 32.645 | 227 L HN 8.177  |
| 202 E CB 30.099 | 210 A HN 8.112  | 219 V HA 4.088  | 227 L N 121.662 |
| 202 E HA 4.105  | 210 A N 122.814 | 219 V HN 8.403  | 228 F CA 57.996 |
| 202 E HN 8.169  | 211 N CA 53.48  | 219 V N 122.421 | 228 F CB 39.37  |
| 202 E N 120.808 | 211 N CB 38.713 | 220 G CA 45.215 | 228 F HA 4.611  |
| 203 L CA 56.658 | 211 N HA 4.648  | 220 G HA2 3.955 | 228 F HN 8.506  |
| 203 L CB 41.991 | 211 N HN 8.208  | 220 G HA3 3.955 | 228 F N 121.104 |
| 203 L HA 4.172  | 211 N N 115.603 | 220 G HN 8.679  | 229 G CA 45.267 |
| 203 L HN 8.276  | 212 R CA 56.664 | 220 G N 113.414 | 229 G HA2 3.878 |
| 203 L N 121.726 | 212 R CB 30.516 | 221 A CA 52.749 | 229 G HA3 3.955 |
| 204 R CA 56.545 | 212 R HA 4.262  | 221 A CB 19.351 | 229 G HN 8.394  |
| 204 R CB 30.434 | 212 R HN 8.061  | 221 A HA 4.327  | 229 G N 111.067 |
| 204 R HA 4.253  | 212 R N 120.543 | 221 A HN 8.387  | 230 S CA 58.276 |
| 204 R HN 8.316  | 213 K CA 56.48  | 221 A N 124.283 | 230 S CB 64.066 |
| 204 R N 121.188 | 213 K CB 33.24  | 222 G CA 45.344 | 230 S HA 4.503  |
| 205 L CA 56.64  | 213 K HA 4.378  | 222 G HA2 4.002 | 230 S HN 8.264  |
| 205 L CB 42.005 | 213 K HN 8.374  | 222 G HA3 4.002 | 230 S N 115.698 |
| 205 L HA 4.246  | 213 K N 121.821 | 222 G HN 8.612  | 231 S CA 56.597 |
| 205 L HN 8.185  | 214 G CA 44.62  | 222 G N 108.576 | 231 S CB 63.326 |
| 205 L N 122.032 | 214 G HA2 4.084 | 223 T CA 61.885 | 231 S HA 4.804  |
| 206 E CA 58.14  | 214 G HA3 4.124 | 223 T CB 69.919 | 231 S HN 8.516  |
| 206 E CB 30.462 | 214 G HN 8.338  | 223 T HA 4.461  | 231 S N 119.092 |
| 206 E HA 4.146  | 214 G N 109.731 | 223 T HN 8.202  | 232 P CA 63.351 |
| 206 E HN 8.364  | 215 P CA 63.439 | 223 T N 113.741 | 232 P CB 32.134 |
| 206 E N 119.793 | 215 P CB 32.151 | 224 T CA 61.903 | 232 P HA 4.422  |
| 207 D CA 55.562 | 215 P HA 4.418  | 224 T CB 69.799 | 233 A CA 52.744 |
| 207 D CB 40.969 | 216 Q CA 55.783 | 224 T HA 4.485  | 233 A CB 19.148 |
| 207 D HA 4.534  | 216 Q CB 29.488 | 224 T HN 8.452  | 233 A HA 4.341  |
| 207 D HN 8.201  | 216 Q HA 4.312  | 224 T N 116.472 | 233 A HN 8.556  |

|                 |                 |                 |                 |
|-----------------|-----------------|-----------------|-----------------|
| 233 A N 124.408 | 242 S CB 63.964 | 250 F HN 8.115  | 259 F CA 58.053 |
| 234 T CA 61.743 | 242 S HA 4.455  | 250 F N 120.352 | 259 F CB 39.596 |
| 234 T CB 69.913 | 242 S HN 8.275  | 251 A CA 52.263 | 259 F HA 4.593  |
| 234 T HA 4.373  | 242 S N 117.617 | 251 A CB 19.159 | 259 F HN 8.321  |
| 234 T HN 8.235  | 243 S CA 58.513 | 251 A HA 4.255  | 259 F N 119.96  |
| 234 T N 113.246 | 243 S CB 63.811 | 251 A HN 8.295  | 260 G CA 45.299 |
| 235 S CA 58.298 | 243 S HA 4.493  | 251 A N 125.682 | 260 G HA2 3.895 |
| 235 S CB 63.852 | 243 S HN 8.53   | 252 Y CA 58.556 | 260 G HA3 3.969 |
| 235 S HA 4.525  | 243 S N 118.35  | 252 Y CB 38.605 | 260 G HN 8.39   |
| 235 S HN 8.423  | 244 S CA 58.64  | 252 Y HA 4.442  | 260 G N 111.073 |
| 235 S N 118.123 | 244 S CB 63.802 | 252 Y HN 8.161  | 261 T CA 61.808 |
| 236 S CA 58.477 | 244 S HA 4.543  | 252 Y N 119.881 | 261 T CB 70.038 |
| 236 S CB 63.815 | 244 S HN 8.495  | 253 G CA 45.385 | 261 T HA 4.403  |
| 236 S HA 4.472  | 244 S N 117.919 | 253 G HA2 3.795 | 261 T HN 8.161  |
| 236 S HN 8.53   | 245 T CA 62.09  | 253 G HA3 3.916 | 261 T N 113.311 |
| 236 S N 118.35  | 245 T CB 69.688 | 253 G HN 8.413  | 262 S CA 58.42  |
| 237 A CA 52.919 | 245 T HA 4.437  | 253 G N 110.958 | 262 S CB 63.81  |
| 237 A CB 19.156 | 245 T HN 8.328  | 254 Q CA 55.907 | 262 S HA 4.565  |
| 237 A HA 4.399  | 245 T N 115.812 | 254 Q CB 29.41  | 262 S HN 8.582  |
| 237 A HN 8.507  | 246 T CA 62.154 | 254 Q HA 4.285  | 262 S N 118.071 |
| 237 A N 126.431 | 246 T CB 69.783 | 254 Q HN 8.237  | 263 T CA 62.014 |
| 238 T CA 62.054 | 246 T HA 4.343  | 254 Q N 119.688 | 263 T CB 69.598 |
| 238 T CB 69.894 | 246 T HN 8.229  | 255 N CA 53.36  | 263 T HA 4.434  |
| 238 T HA 4.331  | 246 T N 116.229 | 255 N CB 38.688 | 263 T HN 8.467  |
| 238 T HN 8.188  | 247 N CA 53.323 | 255 N HA 4.638  | 263 T N 115.878 |
| 238 T N 112.501 | 247 N CB 38.8   | 255 N HN 8.597  | 264 T CA 62.092 |
| 239 G CA 45.335 | 247 N HA 4.74   | 255 N N 119.68  | 264 T CB 69.835 |
| 239 G HA2 3.925 | 247 N HN 8.571  | 256 K CA 56.565 | 264 T HA 4.339  |
| 239 G HA3 3.925 | 247 N N 121.524 | 256 K CB 32.997 | 264 T HN 8.215  |
| 239 G HN 8.39   | 248 S CA 58.893 | 256 K HA 4.323  | 264 T N 115.414 |
| 239 G N 111.073 | 248 S CB 63.732 | 256 K HN 8.427  | 265 G CA 45.162 |
| 240 L CA 55.193 | 248 S HA 4.378  | 256 K N 122.052 | 265 G HA2 3.835 |
| 240 L CB 42.348 | 248 S HN 8.441  | 257 T CA 61.897 | 265 G HA3 3.926 |
| 240 L HA 4.273  | 248 S N 116.645 | 257 T CB 69.991 | 265 G HN 8.429  |
| 240 L HN 8.125  | 249 G CA 45.279 | 257 T HA 4.276  | 265 G N 110.844 |
| 240 L N 121.643 | 249 G HA2 3.853 | 257 T HN 8.249  | 266 F CA 58.104 |
| 241 F CA 57.668 | 249 G HA3 3.916 | 257 T N 115.227 | 266 F CB 39.616 |
| 241 F CB 39.592 | 249 G HN 8.48   | 258 A CA 52.481 | 266 F HA 4.618  |
| 241 F HA 4.66   | 249 G N 110.585 | 258 A CB 19.162 | 266 F HN 8.321  |
| 241 F HN 8.415  | 250 F CA 57.875 | 258 A HA 4.256  | 266 F N 120.087 |
| 241 F N 120.972 | 250 F CB 39.729 | 258 A HN 8.378  | 267 G CA 45.304 |
| 242 S CA 58.118 | 250 F HA 4.541  | 258 A N 126.335 | 267 G HA2 3.875 |

|                 |                 |                 |                 |
|-----------------|-----------------|-----------------|-----------------|
| 267 G HA3 3.976 | 276 Q HA 4.305  | 284 L N 122.579 | 293 T HN 8.383  |
| 267 G HN 8.543  | 276 Q HN 8.317  | 285 F CA 57.535 | 293 T N 114.079 |
| 267 G N 110.816 | 276 Q N 119.905 | 285 F CB 39.541 | 294 T CA 61.712 |
| 268 T CA 61.827 | 277 Q CA 56.088 | 285 F HA 4.652  | 294 T CB 69.89  |
| 268 T CB 69.876 | 277 Q CB 29.285 | 285 F HN 8.233  | 294 T HA 4.462  |
| 268 T HA 4.319  | 277 Q HA 4.303  | 285 F N 120.14  | 294 T HN 8.337  |
| 268 T HN 8.144  | 277 Q HN 8.642  | 286 S CA 58.105 | 294 T N 116.343 |
| 268 T N 112.978 | 277 Q N 121.414 | 286 S CB 63.869 | 295 T CA 62.022 |
| 269 N CB 38.743 | 278 N CA 53.469 | 286 S HA 4.401  | 295 T CB 69.783 |
| 269 N HA 4.985  | 278 N CB 38.704 | 286 S HN 8.167  | 295 T HA 4.329  |
| 269 N HN 8.694  | 278 N HA 4.672  | 286 S N 117.626 | 295 T HN 8.324  |
| 269 N N 121.566 | 278 N HN 8.591  | 287 K CA 54.384 | 295 T N 116.718 |
| 270 P CA 63.96  | 278 N N 119.7   | 287 K CB 32.579 | 296 Q CA 55.877 |
| 270 P CB 31.923 | 279 Q CA 56.088 | 287 K HA 4.56   | 296 Q CB 29.499 |
| 270 P HA 4.402  | 279 Q CB 29.341 | 287 K HN 8.368  | 296 Q HA 4.333  |
| 271 G CA 45.273 | 279 Q HA 4.304  | 287 K N 119.714 | 296 Q HN 8.549  |
| 271 G HA2 3.94  | 279 Q HN 8.511  | 288 P CA 63.169 | 296 Q N 123.004 |
| 271 G HA3 3.94  | 279 Q N 120.79  | 288 P CB 32.052 | 297 N CA 53.232 |
| 271 G HN 8.608  | 280 Q CA 56.086 | 288 P HA 4.382  | 297 N CB 38.745 |
| 271 G N 109.209 | 280 Q CB 29.366 | 289 F CA 58.361 | 297 N HA 4.754  |
| 272 G CA 45.332 | 280 Q HA 4.38   | 289 F CB 39.528 | 297 N HN 8.663  |
| 272 G HA2 3.908 | 280 Q HN 8.594  | 289 F HA 4.553  | 297 N N 120.671 |
| 272 G HA3 3.908 | 280 Q N 121.529 | 289 F HN 8.356  | 298 T CA 62.073 |
| 272 G HN 8.216  | 281 T CA 62.055 | 289 F N 122.579 | 298 T CB 69.766 |
| 272 G N 108.621 | 281 T CB 69.766 | 290 G CA 45.228 | 298 T HA 4.312  |
| 273 L CA 55.342 | 281 T HA 4.403  | 290 G HA2 3.792 | 298 T HN 8.296  |
| 273 L CB 42.239 | 281 T HN 8.394  | 290 G HA3 3.866 | 298 T N 114.386 |
| 273 L HA 4.255  | 281 T N 115.84  | 290 G HN 8.398  | 299 G CA 45.215 |
| 273 L HN 8.2    | 282 T CA 62.031 | 290 G N 110.266 | 299 G HA2 3.86  |
| 273 L N 121.602 | 282 T CB 69.766 | 291 Q CA 55.664 | 299 G HA3 3.933 |
| 274 F CA 58.065 | 282 T HA 4.364  | 291 Q CB 29.716 | 299 G HN 8.507  |
| 274 F CB 39.455 | 282 T HN 8.286  | 291 Q HA 4.316  | 299 G N 110.971 |
| 274 F HA 4.598  | 282 T N 116.664 | 291 Q HN 8.233  | 300 F CA 57.877 |
| 274 F HN 8.434  | 283 S CA 58.405 | 291 Q N 120.14  | 300 F CB 39.78  |
| 274 F N 120.515 | 283 S CB 63.755 | 292 A CA 52.637 | 300 F HA 4.585  |
| 275 G CA 45.338 | 283 S HA 4.436  | 292 A CB 19.235 | 300 F HN 8.2    |
| 275 G HA2 3.837 | 283 S HN 8.478  | 292 A HA 4.378  | 300 F N 120.426 |
| 275 G HA3 3.919 | 283 S N 118.608 | 292 A HN 8.58   | 301 S CA 57.918 |
| 275 G HN 8.361  | 284 L CA 55.342 | 292 A N 126.059 | 301 S CB 63.792 |
| 275 G N 110.542 | 284 L CB 42.172 | 293 T CA 61.83  | 301 S HA 4.382  |
| 276 Q CA 56.088 | 284 L HA 4.254  | 293 T CB 69.766 | 301 S HN 8.26   |
| 276 Q CB 29.341 | 284 L HN 8.356  | 293 T HA 4.414  | 301 S N 117.91  |

|                 |                 |                 |                 |
|-----------------|-----------------|-----------------|-----------------|
| 302 F CA 58.271 | 310 Q HA 4.647  | 319 F CB 39.446 | 328 G CA 45.349 |
| 302 F CB 39.509 | 310 Q HN 8.278  | 319 F HA 4.608  | 328 G HA2 3.98  |
| 302 F HA 4.558  | 310 Q N 120.864 | 319 F HN 8.421  | 328 G HA3 3.98  |
| 302 F HN 8.37   | 311 P CA 63.274 | 319 F N 120.451 | 328 G HN 8.707  |
| 302 F N 119.239 | 311 P CB 32.261 | 320 G CA 45.31  | 328 G N 109.768 |
| 303 G CA 45.301 | 311 P HA 4.466  | 320 G HA2 3.87  | 329 G CA 45.289 |
| 303 G HA2 3.849 | 312 S CA 58.335 | 320 G HA3 3.919 | 329 G HA2 3.924 |
| 303 G HA3 3.945 | 312 S CB 63.739 | 320 G HN 8.367  | 329 G HA3 3.924 |
| 303 G HN 8.453  | 312 S HA 4.504  | 320 G N 110.597 | 329 G HN 8.336  |
| 303 G N 110.5   | 312 S HN 8.679  | 321 V CA 62.542 | 329 G N 108.349 |
| 304 N CA 53.305 | 312 S N 116.69  | 321 V CB 32.854 | 330 L CA 55.303 |
| 304 N CB 38.93  | 313 T CA 61.889 | 321 V HA 4.189  | 330 L CB 42.31  |
| 304 N HA 4.799  | 313 T CB 69.73  | 321 V HN 8.067  | 330 L HA 4.254  |
| 304 N HN 8.409  | 313 T HA 4.368  | 321 V N 119.731 | 330 L HN 8.258  |
| 304 N N 119.051 | 313 T HN 8.364  | 322 T CA 62.182 | 330 L N 121.354 |
| 305 T CA 61.945 | 313 T N 115.765 | 322 T CB 69.847 | 331 F CA 57.834 |
| 305 T CB 69.566 | 314 N CA 53.249 | 322 T HA 4.332  | 331 F CB 39.505 |
| 305 T HA 4.37   | 314 N CB 38.767 | 322 T HN 8.465  | 331 F HA 4.637  |
| 305 T HN 8.349  | 314 N HA 4.802  | 322 T N 119.289 | 331 F HN 8.429  |
| 305 T N 114.632 | 314 N HN 8.574  | 323 Q CA 55.769 | 331 F N 120.168 |
| 306 S CA 58.518 | 314 N N 121.26  | 323 Q CB 29.591 | 332 G CA 45.319 |
| 306 S CB 63.805 | 315 T CA 62.228 | 323 Q HA 4.317  | 332 G HA2 3.968 |
| 306 S HA 4.524  | 315 T CB 69.512 | 323 Q HN 8.604  | 332 G HA3 3.968 |
| 306 S HN 8.492  | 315 T HA 4.317  | 323 Q N 123.831 | 332 G HN 8.337  |
| 306 S N 118.335 | 315 T HN 8.34   | 324 A CA 52.622 | 332 G N 110.37  |
| 307 T CA 61.946 | 315 T N 114.835 | 324 A CB 19.219 | 333 T CA 61.894 |
| 307 T CB 69.652 | 316 M CA 55.893 | 324 A HA 4.314  | 333 T CB 70.007 |
| 307 T HA 4.371  | 316 M CB 32.467 | 324 A HN 8.55   | 333 T HA 4.344  |
| 307 T HN 8.381  | 316 M HA 4.487  | 324 A N 125.953 | 333 T HN 8.169  |
| 307 T N 116.638 | 316 M HN 8.452  | 325 S CA 58.376 | 333 T N 113.589 |
| 308 I CA 61.62  | 316 M N 122.341 | 325 S CB 63.789 | 334 A CA 52.723 |
| 308 I CB 38.518 | 317 G CA 45.327 | 325 S HA 4.413  | 334 A CB 19.25  |
| 308 I HA 4.142  | 317 G HA2 3.899 | 325 S HN 8.395  | 334 A HA 4.403  |
| 308 I HN 8.229  | 317 G HA3 3.899 | 325 S N 115.022 | 334 A HN 8.54   |
| 308 I N 123.612 | 317 G HN 8.434  | 326 Q CA 53.624 | 334 A N 126.495 |
| 309 G CA 45.079 | 317 G N 110.051 | 326 Q CB 28.983 | 335 T CA 61.912 |
| 309 G HA2 3.926 | 318 L CA 55.136 | 326 Q HA 4.664  | 335 T CB 69.9   |
| 309 G HA3 3.926 | 318 L CB 42.288 | 326 Q HN 8.433  | 335 T HA 4.316  |
| 309 G HN 8.66   | 318 L HA 4.265  | 326 Q N 122.612 | 335 T HN 8.3    |
| 309 G N 113.595 | 318 L HN 8.136  | 327 P CA 63.666 | 335 T N 113.323 |
| 310 Q CA 53.38  | 318 L N 121.51  | 327 P CB 32.073 | 336 N CA 53.306 |
| 310 Q CB 28.889 | 319 F CA 57.699 | 327 P HA 4.427  | 336 N CB 38.809 |

|                 |                 |                 |                 |
|-----------------|-----------------|-----------------|-----------------|
| 336 N HA 4.799  | 344 G N 112.173 | 353 T CB 69.756 | 361 G HN 8.65   |
| 336 N HN 8.585  | 345 T CA 62.021 | 353 T HA 4.354  | 361 G N 113.17  |
| 336 N N 121.173 | 345 T CB 69.886 | 353 T HN 8.406  | 362 S CA 58.462 |
| 337 T CA 62.009 | 345 T HA 4.369  | 353 T N 115.547 | 362 S CB 63.915 |
| 337 T CB 69.74  | 345 T HN 8.235  | 354 N CA 53.291 | 362 S HA 4.486  |
| 337 T HA 4.382  | 345 T N 112.968 | 354 N CB 38.773 | 362 S HN 8.307  |
| 337 T HN 8.331  | 346 G CA 45.443 | 354 N HA 4.799  | 362 S N 115.813 |
| 337 T N 114.283 | 346 G HA2 4.025 | 354 N HN 8.671  | 363 T CA 62.116 |
| 338 S CA 58.654 | 346 G HA3 4.055 | 354 N N 121.472 | 363 T CB 69.724 |
| 338 S CB 63.743 | 346 G HN 8.655  | 355 T CA 62.044 | 363 T HA 4.337  |
| 338 S HA 4.537  | 346 G N 111.318 | 355 T CB 69.722 | 363 T HN 8.368  |
| 338 S HN 8.529  | 347 T CA 61.991 | 355 T HA 4.3    | 363 T N 116.423 |
| 338 S N 118.132 | 347 T CB 69.884 | 355 T HN 8.282  | 364 L CA 55.31  |
| 339 T CA 62.098 | 347 T HA 4.365  | 355 T N 114.007 | 364 L CB 42.225 |
| 339 T CB 69.74  | 347 T HN 8.241  | 356 G CA 45.29  | 364 L HA 4.272  |
| 339 T HA 4.378  | 347 T N 112.729 | 356 G HA2 3.84  | 364 L HN 8.233  |
| 339 T HN 8.314  | 348 G CA 45.305 | 356 G HA3 3.918 | 364 L N 124.146 |
| 339 T N 115.135 | 348 G HA2 3.896 | 356 G HN 8.452  | 365 F CA 58.142 |
| 340 G CA 45.423 | 348 G HA3 3.926 | 356 G N 110.892 | 365 F CB 39.589 |
| 340 G HA2 4.025 | 348 G HN 8.567  | 357 F CA 58.099 | 365 F HA 4.618  |
| 340 G HA3 4.025 | 348 G N 110.987 | 357 F CB 39.573 | 365 F HN 8.281  |
| 340 G HN 8.483  | 349 L CA 55.219 | 357 F HA 4.593  | 365 F N 120.491 |
| 340 G N 111.002 | 349 L CB 42.272 | 357 F HN 8.284  | 366 G CA 45.301 |
| 341 T CA 61.806 | 349 L HA 4.265  | 357 F N 120.453 | 366 G HA2 3.844 |
| 341 T CB 69.981 | 349 L HN 8.162  | 358 G CA 45.204 | 366 G HA3 3.914 |
| 341 T HA 4.312  | 349 L N 121.705 | 358 G HA2 3.813 | 366 G HN 8.377  |
| 341 T HN 8.178  | 350 F CA 58.059 | 358 G HA3 3.878 | 366 G N 110.454 |
| 341 T N 113.673 | 350 F CB 39.3   | 358 G HN 8.495  | 367 N CA 53.236 |
| 342 A CA 52.54  | 350 F HA 4.594  | 358 G N 111.149 | 367 N CB 38.773 |
| 342 A CB 19.095 | 350 F HN 8.44   | 359 A CA 52.369 | 367 N HA 4.693  |
| 342 A HA 4.285  | 350 F N 120.727 | 359 A CB 18.115 | 367 N HN 8.412  |
| 342 A HN 8.455  | 351 G CA 45.235 | 359 A HA 4.336  | 367 N N 119.779 |
| 342 A N 126.24  | 351 G HA2 3.822 | 359 A HN 8.194  | 368 N CA 53.502 |
| 343 F CA 58.08  | 351 G HA3 3.905 | 359 A N 124.039 | 368 N CB 38.72  |
| 343 F CB 39.623 | 351 G HN 8.395  | 360 V CA 62.848 | 368 N HA 4.658  |
| 343 F HA 4.582  | 351 G N 110.747 | 360 V CB 32.608 | 368 N HN 8.516  |
| 343 F HN 8.357  | 352 Q CA 55.797 | 360 V HA 4.053  | 368 N N 119.393 |
| 343 F N 119.988 | 352 Q CB 29.541 | 360 V HN 8.362  | 369 K CA 56.558 |
| 344 G CA 45.291 | 352 Q HA 4.404  | 360 V N 120.395 | 369 K CB 32.823 |
| 344 G HA2 3.886 | 352 Q HN 8.278  | 361 G CA 45.33  | 369 K HA 4.276  |
| 344 G HA3 3.977 | 352 Q N 119.926 | 361 G HA2 3.956 | 369 K HN 8.353  |
| 344 G HN 8.391  | 353 T CA 62.018 | 361 G HA3 4.003 | 369 K N 121.427 |



|                 |                 |
|-----------------|-----------------|
| 370 L CA 55.271 | 378 T HA 4.395  |
| 370 L CB 42.334 | 378 T HN 8.265  |
| 370 L HA 4.419  | 378 T N 116.425 |
| 370 L HN 8.335  | 379 S CA 58.215 |
| 370 L N 122.84  | 379 S CB 63.922 |
| 371 T CA 61.941 | 379 S HA 4.452  |
| 371 T CB 69.786 | 379 S HN 8.403  |
| 371 T HA 4.372  | 379 S N 118.851 |
| 371 T HN 8.261  | 380 A CA 50.67  |
| 371 T N 115.228 | 380 A CB 19.292 |
| 372 T CA 62.321 | 380 A HA 4.591  |
| 372 T CB 69.78  | 380 A HN 8.444  |
| 372 T HA 4.306  | 380 A N 127.553 |
| 372 T HN 8.136  | 381 P CA 63.111 |
| 372 T N 116.314 | 381 P CB 32.108 |
| 373 F CA 58.096 | 381 P HA 4.403  |
| 373 F CB 39.641 | 382 S CA 58.212 |
| 373 F HA 4.618  | 382 S CB 63.811 |
| 373 F HN 8.433  | 382 S HA 4.376  |
| 373 F N 123.032 | 382 S HN 8.499  |
| 374 G CA 45.268 | 382 S N 116.329 |
| 374 G HA2 3.858 | 383 F CA 57.804 |
| 374 G HA3 3.962 | 383 F CB 39.574 |
| 374 G HN 8.47   | 383 F HA 4.614  |
| 374 G N 111.523 | 383 F HN 8.475  |
| 375 S CA 58.351 | 383 F N 122.728 |
| 375 S CB 63.97  | 384 G CA 44.937 |
| 375 S HA 4.511  | 384 G HA2 3.771 |
| 375 S HN 8.315  | 384 G HA3 3.842 |
| 375 S N 115.874 | 384 G HN 8.477  |
| 376 S CA 58.538 | 384 G N 112.584 |
| 376 S CB 63.815 |                 |
| 376 S HA 4.568  |                 |
| 376 S HN 8.612  |                 |
| 376 S N 118.147 |                 |
| 377 T CA 62.034 |                 |
| 377 T CB 69.635 |                 |
| 377 T HA 4.449  |                 |
| 377 T HN 8.393  |                 |
| 377 T N 116.036 |                 |
| 378 T CA 61.856 |                 |
| 378 T CB 69.768 |                 |

**Table S2 | Cryo-EM structure determination statistics.**

| <b>Data collection</b>                       |                                                    |        |        |         |
|----------------------------------------------|----------------------------------------------------|--------|--------|---------|
| Microscope                                   | Titan Krios G2                                     |        |        |         |
| Voltage [keV]                                | 300                                                |        |        |         |
| Detector                                     | K3                                                 |        |        |         |
| Magnification                                | 81,000                                             |        |        |         |
| Pixel size [Å]                               | 1.05                                               |        |        |         |
| Defocus range [µm]                           | -0.7 to -2.0                                       |        |        |         |
| Exposure time [s/frame]                      | 2.557                                              |        |        |         |
| Number of frames                             | 40                                                 |        |        |         |
| Total dose [e <sup>-</sup> /Å <sup>2</sup> ] | 40.94 (1.02 e <sup>-</sup> /Å <sup>2</sup> /frame) |        |        |         |
| <b>Reconstruction</b>                        |                                                    |        |        |         |
| Picked segments                              | 356,482                                            |        |        |         |
| Box width [pixels]                           | 250                                                |        |        |         |
| Inter-box distance [pixels]                  | 13                                                 |        |        |         |
| Polymorph type                               | pm1                                                | pm2    | pm3    | pm4     |
| PDB-ID                                       | 7Q64                                               | 7Q65   | 7Q66   | 7Q67    |
| EMDB-ID                                      | 13851                                              | 13852  | 13853  | 13854   |
| Final segments [no.]                         | 71,697                                             | 11,085 | 28,360 | 12,674  |
| Final resolution [Å] <sup>a</sup>            | 2.76                                               | 3.32   | 2.79   | 3.37    |
| Sharpening B-factor [Å <sup>2</sup> ]        | -92.90                                             | -90.48 | -80.93 | -111.67 |
| Symmetry imposed                             | C1                                                 | C1     | C1     | C1      |
| Helical rise [Å]                             | 4.65                                               | 4.68   | 4.67   | 2.37    |
| Helical twist [°]                            | -3.09                                              | -2.33  | -3.29  | 178.49  |

<sup>a</sup> The resolution was estimated from the value of the FSC curve for two independently refined half-maps at 0.143.

**Table S3 | Model building statistics.**

|                          | pm1   | pm2   | pm3    | pm4   |
|--------------------------|-------|-------|--------|-------|
| <b>PDB-ID</b>            | 7Q64  | 7Q65  | 7Q66   | 7Q67  |
| <b>Model composition</b> |       |       |        |       |
| Chains                   | 30    | 22    | 22     | 11    |
| Non-hydrogen atoms       | 7,809 | 6,204 | 4,807  | 2,618 |
| Protein residues         | 1,100 | 880   | 682    | 363   |
| <b>RMS deviations</b>    |       |       |        |       |
| Bond lengths [Å]         | 0.01  | 0.02  | 0.02   | 0.02  |
| Bond angles [°]          | 1.34  | 1.67  | 1.55   | 2.21  |
| <b>Validation</b>        |       |       |        |       |
| Model resolution (Å)     | 3.02  | 3.27  | 2.88   | 3.71  |
| MolProbity score         | 2.34  | 2.40  | 2.26   | 2.96  |
| Clashscore               | 7.37  | 3.45  | 13.59  | 12.16 |
| <b>Ramachandran plot</b> |       |       |        |       |
| Outliers [%]             | 0.00  | 0.00  | 0.00   | 0.00  |
| Allowed [%]              | 8.29  | 10.53 | 0.00   | 16.13 |
| Favored [%]              | 91.71 | 89.47 | 100.00 | 83.87 |
